# Supplementary material for: High-level expression and molecular characterization of a recombinant prolidase from Escherichia coli NovaBlue
Source: PeerJ journal article supplement (doi:10.7717/peerj.5863), 2018-10-31

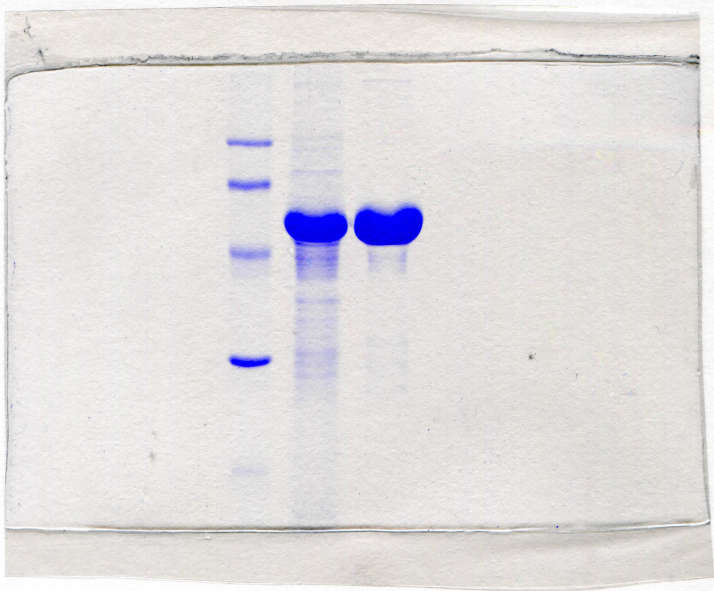

Supplement: Raw_data-Fig_2A_SDS-PAGE.pdf [file Raw_data-Fig_2A_SDS-PAGE.pdf]
