# Supplementary material for: High-level expression and molecular characterization of a recombinant prolidase from Escherichia coli NovaBlue
Source: PeerJ. 2018 Oct 31;6:e5863. doi: 10.7717/peerj.5863 (PMC6215446; doi:10.7717/peerj.5863)
Supplement: Supplemental Information 1 [file peerj-06-5863-s001.xls]

## Sheet: 工作表1
4℃ (200x)	0	0.005	0.01	0.05	0.1	0.5	16℃ (200x)	0	0.005	0.01	0.05	0.1	0.5
	0.127	0.135	0.15	0.167	0.196	0.173		0.161	0.162	0.135	0.181	0.321	0.29
protein (OD 515)	0.127	0.162	0.146	0.164	0.189	0.186	protein (OD 515)	0.125	0.153	0.15	0.162	0.331	0.277
	0.122	0.129	0.154	0.181	0.195	0.179		0.147	0.166	0.23	0.172	0.306	0.261
protein (OD 515) avg	0.125333	0.142	0.15	0.170667	0.193333	0.179333	protein (OD 515) avg	0.144333	0.160333	0.171667	0.171667	0.319333	0.276
proline (μM)	81.629	92.732	98.0614	111.829	126.929	117.603	proline (μM)	94.2864	104.945	112.495	112.495	210.868	182
proline/min (μM/min)	8.1629	9.2732	9.80614	11.1829	12.6929	11.7603	proline/min (μM/min)	9.42864	10.4945	11.2495	11.2495	21.0868	18.2
proline/min (U=μmloe/min)	0.00408145	0.0046366	0.00490307	0.00559146	0.00634646	0.00588013	proline/min (U=μmloe/min)	0.00471432	0.00524726	0.00562476	0.00562476	0.0105434	0.00909999
protein con. in mixture (mg/ml)	0.00054	0.00054	0.00054	0.00054	0.00054	0.00054	protein con. in mixture (mg/ml)	0.00054	0.00054	0.00054	0.00054	0.00054	0.00054
specific activity (U/mg)	7.55824	8.5863	9.07976	10.3545	11.7527	10.8891	specific activity (U/mg)	8.73022	9.71715	10.4162	10.4162	19.5248	16.8518
Relative activity (%)	64.3107	73.0581	77.2568	88.1036	100	92.6522	Relative activity (%)	44.7136	49.7683	53.3488	53.3488	100	86.31
25℃ (200x)	0	0.005	0.01	0.05	0.1	0.5	37℃ (200x)	0	0.005	0.01	0.05	0.1	0.5
	0.115	0.112	0.19	0.235	0.67	0.297		0.065	0.067	0.052	0.089	0.265	0.062
protein (OD 515)	0.111	0.202	0.196	0.225	0.624	0.202	protein (OD 515)		0.071	0.053	0.085	0.266	0.065
	0.181	0.124	0.211	0.219	0.688	0.281		0.057	0.063	0.06	0.057	0.23	0.114
protein (OD 515) avg	0.135667	0.146	0.199	0.226333	0.660667	0.26	protein (OD 515) avg	0.061	0.067	0.055	0.077	0.253667	0.0803333
proline (μM)	88.5129	95.3967	130.704	148.913	438.256	171.341	proline (μM)	38.7716	42.7686	34.7745	49.4304	167.122	51.651
proline/min (μM/min)	8.85129	9.53967	13.0704	14.8913	43.8256	17.1341	proline/min (μM/min)	3.87716	4.27686	3.47745	4.94304	16.7122	5.1651
proline/min (U=μmloe/min)	0.00442564	0.00476984	0.00653521	0.00744565	0.0219128	0.00856705	proline/min (U=μmloe/min)	0.00193858	0.00213843	0.00173872	0.00247152	0.00835609	0.00258255
protein con. in mixture (mg/ml)	0.00054	0.00054	0.00054	0.00054	0.00054	0.00054	protein con. in mixture (mg/ml)	0.00054	0.00054	0.00054	0.00054	0.00054	0.00054
specific activity (U/mg)	8.19564	8.83303	12.1022	13.7882	40.5793	15.8649	specific activity (U/mg)	3.58996	3.96006	3.21986	4.57689	15.4742	4.7825
Relative activity (%)	20.1966	21.7673	29.8237	33.9785	100	39.0961	Relative activity (%)	23.1996	25.5913	20.8079	29.5775	100	30.9062

## Sheet: 105.07.22
4℃	0	0.005	0.01	0.05	0.1	0.5		25℃	0	0.005	0.01	0.05	0.1	0.5			0.964773	5.04159	7.30409	12.2344	16.618	11.1126
	0.084	0.108	0.118	0.131	0.118	0.144				0.336	0.431	0.576	0.574	0.634			0.77795	4.08003	6.81388	18.8617	20.9733	17.8058
protein (OD 595)	0.096	0.101	0.098	0.116	0.105	0.136		protein (OD 595)	0.351	0.338		0.588	0.565	0.652			0.442106	4.52936	7.1099	28.3529	36.879	35.2274
	0.091	0.098	0.098	0.118	0.112	0.144			0.351		0.447	0.59	0.622				0.718039	4.56164	19.729	26.8181	27.6665	25.5926
avg	0.0903333	0.102333	0.104667	0.121667	0.111667	0.141333		avg	0.351	0.337	0.439	0.584667	0.587	0.643
protein (mg/ml)	0.497037	0.63037	0.656296	0.845185	0.734074	1.0637		protein (mg/ml)	1.69667	1.61889	2.18556	2.99481	3.00778	3.31889
Reaction concentration (mg/ml)	0.493	0.03	0.03	0.03	0.03	0.03		Reaction concentration (mg/ml)	1.69	0.03	0.03	0.03	0.03	0.03
	0.282	0.109	0.131	0.257	0.303	0.222			0.376	0.068	0.14	0.518	0.601	0.564
protein (OD 515)	0.244	0.101	0.148	0.202	0.3	0.189		protein (OD 515)	0.414	0.073	0.099	0.431	0.575	0.58
	0.293	0.079	0.13	0.245	0.3	0.2			0.438	0.1	0.127	0.446	0.632	0.584
avg	0.2875	0.0963333	0.136333	0.2235	0.301	0.203667		protein (OD 515) avg	0.409333	0.0803333	0.122	0.465	0.602667	0.576
proline (μM)	190.253	60.4991	87.649	146.813	199.416	133.351		proline (μM)	272.947	49.6391	77.9203	310.731	404.172	386.072
proline/min (μM/min)	19.0253	6.04991	8.7649	14.6813	19.9416	13.3351		proline/min (μM/min)	27.2947	4.96391	7.79203	31.0731	40.4172	38.6072
proline/min (U=μmloe/min)	0.00951266	0.00302496	0.00438245	0.00734066	0.00997081	0.00666757		proline/min (U=μmloe/min)	0.0136228	0.00247749	0.003889	0.0155086	0.0201722	0.0192689
protein con. in mixture (mg/ml)	0.00986	0.0006	0.0006	0.0006	0.0006	0.0006		protein con. in mixture (mg/ml)	0.0308135	0.000546985	0.000546985	0.000546985	0.000546985	0.000546985
specific activity (U/mg)	0.964773	5.04159	7.30409	12.2344	16.618	11.1126		specific activity (U/mg)	0.442106	4.52936	7.1099	28.3529	36.879	35.2274
Relative activity (%)	5.80558	30.3381	43.9528	73.6215	100	66.8709		Relative activity (%)	1.1988	12.2817	19.279	76.8809	100	95.5217
16℃	0	0.005	0.01	0.05	0.1	0.5		37℃	0	0.005	0.01	0.05	0.1	0.5
	0.302	0.35	0.354	0.384	0.411	0.342			0.398	0.404	0.501	0.418	0.47	0.505
protein (OD 595)	0.347	0.33	0.345	0.363	0.418	0.339		protein (OD 595)	0.426	0.408	0.499	0.421	0.475	0.517
	0.351	0.356	0.379	0.413	0.433	0.374			0.421		0.501		0.483	0.494
avg	0.349	0.345333	0.3495	0.3985	0.4145	0.3405		avg	0.415	0.406	0.500333	0.4195	0.476	0.505333
protein (mg/ml)	1.68556	1.66519	1.68833	1.96056	2.04944	1.63833		protein (mg/ml)	2.05222	2.00222	2.5263	2.07722	2.39111	2.55407
Reaction concentration (mg/ml)	1.69	0.03	0.03	0.03	0.03	0.03		Reaction concentration (mg/ml)	2.05	0.5	0.03	0.03	0.03	0.03
	0.772	0.087	0.14	0.339	0.409	0.307			0.867	1.342	0.43	0.474	0.485	0.471
protein (OD 515)	0.825	0.066	0.124	0.339	0.366	0.324		protein (OD 515)	0.912	1.388	0.32	0.474	0.481	0.466
	0.749	0.085	0.119	0.344	0.359	0.335			0.845	1.324	0.318	0.496	0.523	0.442
protein (OD 515) avg	0.782	0.0793333	0.127667	0.340667	0.378	0.322		protein (OD 515) avg	0.874667	1.35133	0.356	0.481333	0.496333	0.459667
proline (μM)	525.894	48.9604	81.7666	226.34	251.68	213.67		proline (μM)	588.792	912.328	236.747	321.817	331.998	307.111
proline/min (μM/min)	52.5894	4.89604	8.17666	22.634	25.168	21.367		proline/min (μM/min)	58.8792	91.2328	23.6747	32.1817	33.1998	30.7111
proline/min (U=μmloe/min)	0.0262947	0.00244802	0.00408833	0.011317	0.012584	0.0106835		proline/min (U=μmloe/min)	0.0294396	0.0456164	0.0118374	0.0160909	0.0165999	0.0153556
protein con. in mixture (mg/ml)	0.0338	0.0006	0.0006	0.0006	0.0006	0.0006		protein con. in mixture (mg/ml)	0.041	0.01	0.0006	0.0006	0.0006	0.0006
specific activity (U/mg)	0.77795	4.08003	6.81388	18.8617	20.9733	17.8058		specific activity (U/mg)	0.718039	4.56164	19.729	26.8181	27.6665	25.5926
Relative activity (%)	3.70924	19.4534	32.4883	89.9317	100	84.8975		Relative activity (%)	2.59533	16.4879	71.3098	96.9334	100	92.5037
