# Supplementary material for: High-level expression and molecular characterization of a recombinant prolidase from Escherichia coli NovaBlue
Source: PeerJ. 2018 Oct 31;6:e5863. doi: 10.7717/peerj.5863 (PMC6215446; doi:10.7717/peerj.5863)
Supplement: Supplemental Information 6 [file peerj-06-5863-s006.xls]

## Sheet: activity and stability
Specific activity			effects of temp. on activity	4	20	25	30	40	50	60	70	80		effects of temp. on stability	4	20	25	30	40	50	60	70	80
standard curve of protein：y = 0.0009x + 0.0456				0.316	0.644	0.782	1.078	1.187	1.216	1.289	1.157	0.548			0.913	0.919	0.91	0.92	0.494	0.011	0.016	0.014	0.021
standard curve of proline： y = 1.4733x+0.0072			protein (OD 515)	0.285	0.646	0.818	1.072	1.19	1.216	1.264	1.161	0.549		protein (OD 515)	0.856	0.913	0.945	0.963	0.543	0.007	0.009	0.005	0.018
				0.316	0.622	0.8	1.079	1.191	1.218	1.31	1.182	0.553			0.862	0.9	0.974	0.955	0.529	0.009	0.011	0.01	0.009
	0.512		protein (OD 515) avg	0.305667	0.637333	0.8	1.07633	1.18933	1.21667	1.28767	1.16667	0.55		protein (OD 515) avg	0.877	0.910667	0.943	0.946	0.522	0.009	0.012	0.00966667	0.016
1/19 purified	0.538		proline (μM)	202.584	427.702	538.112	725.673	802.371	820.924	869.115	786.986	368.425		proline (μM)	590.375	613.227	635.173	637.209	349.42	1.22175	3.25799	1.67425	5.97299
	0.558		proline/min (μM/min)	20.2584	42.7702	53.8112	72.5673	80.2371	82.0924	86.9115	78.6986	36.8425		proline/min (μM/min)	59.0375	61.3227	63.5173	63.7209	34.942	0.122175	0.325799	0.167425	0.597299
AVG	0.536		proline/min (U=μmloe/min)	0.0101292	0.0213851	0.0269056	0.0362836	0.0401186	0.0410462	0.0434557	0.0393493	0.0184212		proline/min (U=μmloe/min)	0.0295188	0.0306613	0.0317586	0.0318604	0.017471	6.10874e-05	0.0001629	8.37123e-05	0.000298649
protein con. (mg)	5.44889		protein con. (mg)	5.44889	5.44889	5.44889	5.44889	5.44889	5.44889	5.44889	5.44889	5.44889		protein con. (mg)	5.44889	5.44889	5.44889	5.44889	5.44889	5.44889	5.44889	5.44889	5.44889
			protein con. in mixture (mg/ml)	0.000544889	0.000544889	0.000544889	0.000544889	0.000544889	0.000544889	0.000544889	0.000544889	0.000544889		protein con. in mixture (mg/ml)	0.000544889	0.000544889	0.000544889	0.000544889	0.000544889	0.000544889	0.000544889	0.000544889	0.000544889
			specific activity (U/mg)	18.5895	39.2467	49.3781	66.589	73.627	75.3294	79.7516	72.2153	33.8073		specific activity (U/mg)	54.1739	56.2708	58.2846	58.4715	32.0634	0.11211	0.298959	0.153632	0.548092
			Relative activity (%)	23.3092	49.2112	61.9149	83.4956	92.3205	94.4551	100	90.5503	42.3908		Relative activity (%)	92.6502	96.2363	99.6804	100	54.836	0.191734	0.511291	0.262747	0.937367
			protein (OD 515) avg	0.316	0.644	0.782	1.078	1.187	1.216	1.289	1.157	0.548		protein (OD 515) avg	0.913	0.919	0.91	0.92	0.494	0.011	0.016	0.014	0.021
			proline (μM)	209.598	432.227	525.894	726.804	800.787	820.471	870.02	780.425	367.067		proline (μM)	614.81	618.883	612.774	619.562	330.415	2.57924	5.97299	4.61549	9.36673
			proline/min (μM/min)	20.9598	43.2227	52.5894	72.6804	80.0787	82.0471	87.002	78.0425	36.7067		proline/min (μM/min)	61.481	61.8883	61.2774	61.9562	33.0415	0.257924	0.597299	0.461549	0.936673
			proline/min (U=μmloe/min)	0.0104799	0.0216113	0.0262947	0.0363402	0.0400394	0.0410236	0.043501	0.0390212	0.0183534		proline/min (U=μmloe/min)	0.0307405	0.0309441	0.0306387	0.0309781	0.0165207	0.000128962	0.000298649	0.000230774	0.000468336
			protein con. (mg)	5.44889	5.44889	5.44889	5.44889	5.44889	5.44889	5.44889	5.44889	5.44889		protein con. (mg)	5.44889	5.44889	5.44889	5.44889	5.44889	5.44889	5.44889	5.44889	5.44889
			protein con. in mixture (mg/ml)	0.000544889	0.000544889	0.000544889	0.000544889	0.000544889	0.000544889	0.000544889	0.000544889	0.000544889		protein con. in mixture (mg/ml)	0.000544889	0.000544889	0.000544889	0.000544889	0.000544889	0.000544889	0.000544889	0.000544889	0.000544889
			specific activity (U/mg)	19.233	39.6619	48.257	66.6928	73.4817	75.2879	79.8346	71.6132	33.6828		specific activity (U/mg)	56.4161	56.7898	56.2293	56.8521	30.3195	0.236676	0.548092	0.423526	0.859508
			Relative activity (%)	24.1162	49.7319	60.5092	83.6258	92.1383	94.4031	100.104	89.7954	42.2346		Relative activity (%)	70.7398	71.2084	70.5055	71.2865	38.0174	0.296767	0.687249	0.531056	1.07773
			protein (OD 515) avg	0.285	0.646	0.818	1.072	1.19	1.216	1.264	1.161	0.549		protein (OD 515) avg	0.856	0.913	0.945	0.963	0.543	0.007	0.009	0.005	0.018
			proline (μM)	188.556	433.584	550.329	722.731	802.824	820.471	853.051	783.14	367.746		proline (μM)	576.122	614.81	636.53	648.748	363.673	-0.13575	1.22175	-1.49325	7.33048
			proline/min (μM/min)	18.8556	43.3584	55.0329	72.2731	80.2824	82.0471	85.3051	78.314	36.7746		proline/min (μM/min)	57.6122	61.481	63.653	64.8748	36.3673	-0.013575	0.122175	-0.149325	0.733048
			proline/min (U=μmloe/min)	0.00942782	0.0216792	0.0275165	0.0361366	0.0401412	0.0410236	0.0426525	0.039157	0.0183873		proline/min (U=μmloe/min)	0.0288061	0.0307405	0.0318265	0.0324374	0.0181837	-6.78748e-06	6.10874e-05	-7.46623e-05	0.000366524
			protein con. (mg)	5.44889	5.44889	5.44889	5.44889	5.44889	5.44889	5.44889	5.44889	5.44889		protein con. (mg)	5.44889	5.44889	5.44889	5.44889	5.44889	5.44889	5.44889	5.44889	5.44889
			protein con. in mixture (mg/ml)	0.000544889	0.000544889	0.000544889	0.000544889	0.000544889	0.000544889	0.000544889	0.000544889	0.000544889		protein con. in mixture (mg/ml)	0.000544889	0.000544889	0.000544889	0.000544889	0.000544889	0.000544889	0.000544889	0.000544889	0.000544889
			specific activity (U/mg)	17.3023	39.7865	50.4992	66.3191	73.6686	75.2879	78.2775	71.8623	33.745		specific activity (U/mg)	52.866	56.4161	58.4092	59.5303	33.3713	-0.0124566	0.11211	-0.137023	0.672658
			Relative activity (%)	21.6952	49.8881	63.3207	83.1572	92.3726	94.4031	98.1517	90.1078	42.3127		Relative activity (%)	66.2883	70.7398	73.2389	74.6447	41.8441	-0.0156193	0.140574	-0.171812	0.843442
			protein (OD 515) avg	0.316	0.622	0.8	1.079	1.191	1.218	1.31	1.182	0.553		protein (OD 515) avg	0.862	0.9	0.974	0.955	0.529	0.009	0.011	0.01	0.009
			proline (μM)	209.598	417.295	538.112	727.483	803.502	821.829	884.273	797.394	370.461		proline (μM)	580.194	605.987	656.214	643.318	354.171	1.22175	2.57924	1.9005	1.22175
			proline/min (μM/min)	20.9598	41.7295	53.8112	72.7483	80.3502	82.1829	88.4273	79.7394	37.0461		proline/min (μM/min)	58.0194	60.5987	65.6214	64.3318	35.4171	0.122175	0.257924	0.19005	0.122175
			proline/min (U=μmloe/min)	0.0104799	0.0208647	0.0269056	0.0363741	0.0401751	0.0410914	0.0442137	0.0398697	0.018523		proline/min (U=μmloe/min)	0.0290097	0.0302993	0.0328107	0.0321659	0.0177085	6.10874e-05	0.000128962	9.50248e-05	6.10874e-05
			protein con. (mg)	5.44889	5.44889	5.44889	5.44889	5.44889	5.44889	5.44889	5.44889	5.44889		protein con. (mg)	5.44889	5.44889	5.44889	5.44889	5.44889	5.44889	5.44889	5.44889	5.44889
			protein con. in mixture (mg/ml)	0.000544889	0.000544889	0.000544889	0.000544889	0.000544889	0.000544889	0.000544889	0.000544889	0.000544889		protein con. in mixture (mg/ml)	0.000544889	0.000544889	0.000544889	0.000544889	0.000544889	0.000544889	0.000544889	0.000544889	0.000544889
			specific activity (U/mg)	19.233	38.2917	49.3781	66.7551	73.7308	75.4125	81.1425	73.1703	33.9942		specific activity (U/mg)	53.2397	55.6064	60.2154	59.032	32.4994	0.11211	0.236676	0.174393	0.11211
			Relative activity (%)	24.1162	48.0137	61.9149	83.7039	92.4507	94.5593	101.744	91.7478	42.6251		Relative activity (%)	66.7569	69.7246	75.5037	74.0199	40.7508	0.140574	0.296767	0.21867	0.140574
			error bar	1.39776	1.03998	1.40574	0.295669	0.162571	0.0901781	1.79848	1.04874	0.206624		error bar	2.44606	0.758515	2.50275	1.786	1.97107	0.156193	0.281581	0.352157	0.487713
				4	23.3092	1.39776									4	92.6502	2.44606
				20	49.2112	1.03998									20	96.2363	0.758515
				25	61.9149	1.40574									25	99.6804	2.50275
				30	83.4956	0.295669									30	100	1.786
				40	92.3205	0.162571									40	54.836	1.97107
				50	94.4551	0.0901781									50	0.191734	0.156193
				60	100	1.79848									60	0.511291	0.281581
				70	90.5503	1.04874									70	0.262747	0.352157
				80	42.3908	0.206624									80	0.937367	0.487713
