# Supplementary material for: High-level expression and molecular characterization of a recombinant prolidase from Escherichia coli NovaBlue
Source: PeerJ. 2018 Oct 31;6:e5863. doi: 10.7717/peerj.5863 (PMC6215446; doi:10.7717/peerj.5863)
Supplement: Supplemental Information 7 [file peerj-06-5863-s007.xls]

## Sheet: 105.07.04 pH effect on activity
105.07.04 pH	Phosphate-citrate			Sodium-acetate				Sodium-citrate			Sodium-phosphate			Hepes-NaOH			Tris-HCl				Glycine-NAOH					2.76	0.222552	0.442542	3.62	0.037092	0.796152	3.99	3.48135	0.843043	6	5.60089	0.642452	6.8	88.3955	0.914341	7	92.4491	2.07925	8.6	97.748	1.61333
	2.76	3.18	5.03	3.62	4.34	4.96	5.9	3.99	5	5.98	6	7	8	6.8	7.5	8.2	7	8	8.5	9	8.6	9	10	10.6		3.18	-0.0158966	0.346458	4.34	5.75986	1.18026	5	4.24968	0.511003	7	48.3362	0.485648	7.5	90.1176	2.25373	8	100	1.34887	9	90.2236	1.51748
	0.011	0.002	0.124	0.019	0.022	0.182	0.982	0.128	0.056	0.14	0.079	0.614	1.211	1.108	1.109	1.236	1.167	1.274	1.173	0.852	1.219	1.106	0.236	0.003		5.03	10.5023	0.955448	4.96	8.62124	2.64153	5.98	9.17762	1.23646	8	95.6284	2.64153	8.2	94.4627	1.57368	8.5	90.2236	2.12434	10	18.3446	0.275337
	0.004	0.009	0.187	0	0.001	0.135	0.99	0.005	0.068	0.118	0.085	0.61	1.164	1.119	1.151	1.143	1.198	1.224	1.13	0.764	1.233	1.133	0.236	0.002					5.9	77.4799	0.449623										9	63.3054	1.74229	10.6	-0.174862	0.346458
	0.015	0.01	0.107	0.004	0.216	0.03	0.974	0.02	0.058	0.11	0.069	0.622	1.256	1.131	1.163	1.208	1.146	1.298	1.124	0.795	1.259	1.188	0.242	0.01
protein (OD 515) avg	0.01	0.007	0.139333	0.00766667	0.0796667	0.115667	0.982	0.051	0.0606667	0.122667	0.0776667	0.615333	1.21033	1.11933	1.141	1.19567	1.17033	1.26533	1.14233	0.803667	1.237	1.14233	0.238	0.005
	Phosphate-citrate			Sodium-acetate				Sodium-citrate			Sodium-phosphate			Hepes-NaOH			Tris-HCl				Glycine-NAOH
pH	2.76	3.18	5.03	3.62	4.34	4.96	5.9	3.99	5	5.98	6	7	8	6.8	7.5	8.2	7	8	8.5	9	8.6	9	10	10.6
protein (OD 515) avg	0.01	0.007	0.139333	0.00766667	0.0796667	0.115667	0.982	0.051	0.0606667	0.122667	0.0776667	0.615333	1.21033	1.11933	1.141	1.19567	1.17033	1.26533	1.14233	0.803667	1.237	1.14233	0.238	0.005
proline (μM)	1.9005	-0.13575	89.6853	0.316749	49.1866	73.6216	661.644	29.7292	36.2904	78.3728	47.8291	412.77	816.625	754.859	769.565	806.67	789.475	853.956	770.47	540.6	834.725	770.47	156.655	-1.49325
proline/min (μM/min)	0.19005	-0.013575	8.96853	0.0316749	4.91866	7.36216	66.1644	2.97292	3.62904	7.83728	4.78291	41.277	81.6625	75.4859	76.9565	80.667	78.9475	85.3956	77.047	54.06	83.4725	77.047	15.6655	-0.149325
proline/min (U=μmloe/min)	9.50248e-05	-6.78748e-06	0.00448426	1.58375e-05	0.00245933	0.00368108	0.0330822	0.00148646	0.00181452	0.00391864	0.00239146	0.0206385	0.0408312	0.0377429	0.0384782	0.0403335	0.0394737	0.0426978	0.0385235	0.02703	0.0417362	0.0385235	0.00783276	-7.46623e-05
protein con. (mg)	5.44889	5.44889	5.44889	5.44889	5.44889	5.44889	5.44889	5.44889	5.44889	5.44889	5.44889	5.44889	5.44889	5.44889	5.44889	5.44889	5.44889	5.44889	5.44889	5.44889	5.44889	5.44889	5.44889	5.44889
protein con. in mixture (mg/ml)	0.000544889	0.000544889	0.000544889	0.000544889	0.000544889	0.000544889	0.000544889	0.000544889	0.000544889	0.000544889	0.000544889	0.000544889	0.000544889	0.000544889	0.000544889	0.000544889	0.000544889	0.000544889	0.000544889	0.000544889	0.000544889	0.000544889	0.000544889	0.000544889
specific activity (U/mg)	0.174393	-0.0124566	8.22968	0.0290655	4.51345	6.75565	60.7136	2.728	3.33007	7.19163	4.38889	37.8765	74.935	69.2672	70.6167	74.0215	72.4436	78.3605	70.6997	49.6065	76.5959	70.6997	14.375	-0.137023
Relative activity (%)	0.222552	-0.0158966	10.5023	0.037092	5.75986	8.62124	77.4799	3.48135	4.24968	9.17762	5.60089	48.3362	95.6284	88.3955	90.1176	94.4627	92.4491	100	90.2236	63.3054	97.748	90.2236	18.3446	-0.174862
protein (OD 515) avg	0.011	0.002	0.124	0.019	0.022	0.182	0.982	0.128	0.056	0.14	0.079	0.614	1.211	1.108	1.109	1.236	1.167	1.274	1.173	0.852	1.219	1.106	0.236	0.003
proline (μM)	2.57924	-3.52949	79.2778	8.00923	10.0455	118.645	661.644	81.9928	33.1229	90.1378	48.7341	411.865	817.077	747.166	747.845	834.046	787.212	859.838	791.285	573.407	822.507	745.809	155.298	-2.85074
proline/min (μM/min)	0.257924	-0.352949	7.92778	0.800923	1.00455	11.8645	66.1644	8.19928	3.31229	9.01378	4.87341	41.1865	81.7077	74.7166	74.7845	83.4046	78.7212	85.9838	79.1285	57.3407	82.2507	74.5809	15.5298	-0.285074
proline/min (U=μmloe/min)	0.000128962	-0.000176475	0.00396389	0.000400462	0.000502274	0.00593226	0.0330822	0.00409964	0.00165615	0.00450689	0.00243671	0.0205932	0.0408539	0.0373583	0.0373922	0.0417023	0.0393606	0.0429919	0.0395642	0.0286703	0.0411254	0.0372904	0.00776488	-0.000142537
protein con. (mg)	5.44889	5.44889	5.44889	5.44889	5.44889	5.44889	5.44889	5.44889	5.44889	5.44889	5.44889	5.44889	5.44889	5.44889	5.44889	5.44889	5.44889	5.44889	5.44889	5.44889	5.44889	5.44889	5.44889	5.44889
protein con. in mixture (mg/ml)	0.000544889	0.000544889	0.000544889	0.000544889	0.000544889	0.000544889	0.000544889	0.000544889	0.000544889	0.000544889	0.000544889	0.000544889	0.000544889	0.000544889	0.000544889	0.000544889	0.000544889	0.000544889	0.000544889	0.000544889	0.000544889	0.000544889	0.000544889	0.000544889
specific activity (U/mg)	0.236676	-0.323873	7.27468	0.734942	0.921791	10.8871	60.7136	7.52381	3.03942	8.27121	4.47193	37.7934	74.9765	68.5613	68.6236	76.5336	72.236	78.9003	72.6097	52.6168	75.4748	68.4368	14.2504	-0.261589
Relative activity (%)	0.302035	-0.413311	9.28359	0.937897	1.17635	13.8936	77.4799	9.60153	3.87876	10.5553	5.70687	48.2302	95.6814	87.4947	87.5742	97.6685	92.1842	100.689	92.6611	67.1471	96.3173	87.3357	18.1857	-0.333828
protein (OD 515) avg	0.004	0.009	0.187	0	0.001	0.135	0.99	0.005	0.068	0.118	0.085	0.61	1.164	1.119	1.151	1.143	1.198	1.224	1.13	0.764	1.233	1.133	0.236	0.002
proline (μM)	-2.17199	1.22175	122.039	-4.88699	-4.20824	86.744	667.074	-1.49325	41.2679	75.2053	52.8066	409.15	785.176	754.632	776.352	770.922	808.254	825.901	762.099	513.677	832.01	764.135	155.298	-3.52949
proline/min (μM/min)	-0.217199	0.122175	12.2039	-0.488699	-0.420824	8.6744	66.7074	-0.149325	4.12679	7.52053	5.28066	40.915	78.5176	75.4632	77.6352	77.0922	80.8254	82.5901	76.2099	51.3677	83.201	76.4135	15.5298	-0.352949
proline/min (U=μmloe/min)	-0.0001086	6.10874e-05	0.00610195	-0.000244349	-0.000210412	0.0043372	0.0333537	-7.46623e-05	0.0020634	0.00376027	0.00264033	0.0204575	0.0392588	0.0377316	0.0388176	0.0385461	0.0404127	0.0412951	0.0381049	0.0256838	0.0416005	0.0382067	0.00776488	-0.000176475
protein con. (mg)	5.44889	5.44889	5.44889	5.44889	5.44889	5.44889	5.44889	5.44889	5.44889	5.44889	5.44889	5.44889	5.44889	5.44889	5.44889	5.44889	5.44889	5.44889	5.44889	5.44889	5.44889	5.44889	5.44889	5.44889
protein con. in mixture (mg/ml)	0.000544889	0.000544889	0.000544889	0.000544889	0.000544889	0.000544889	0.000544889	0.000544889	0.000544889	0.000544889	0.000544889	0.000544889	0.000544889	0.000544889	0.000544889	0.000544889	0.000544889	0.000544889	0.000544889	0.000544889	0.000544889	0.000544889	0.000544889	0.000544889
specific activity (U/mg)	-0.199306	0.11211	11.1985	-0.448439	-0.386156	7.95979	61.2119	-0.137023	3.78682	6.90098	4.84563	37.5443	72.0492	69.2464	71.2395	70.7412	74.1668	75.7862	69.9316	47.1359	76.3467	70.1184	14.2504	-0.323873
Relative activity (%)	-0.254345	0.143069	14.291	-0.572276	-0.492794	10.1579	78.1157	-0.174862	4.83256	8.8067	6.18376	47.9123	91.9457	88.369	90.9125	90.2766	94.6482	96.7147	89.2433	60.1526	97.4301	89.4818	18.1857	-0.413311
protein (OD 515) avg	0.015	0.01	0.107	0.004	0.216	0.03	0.974	0.02	0.058	0.11	0.069	0.622	1.256	1.131	1.163	1.208	1.146	1.298	1.124	0.795	1.259	1.188	0.242	0.01
proline (μM)	5.29424	1.9005	67.7391	-2.17199	141.723	15.4755	656.214	8.68798	34.4804	69.7753	41.9467	417.295	847.621	762.777	784.497	815.041	772.959	876.128	758.026	534.718	849.657	801.466	159.37	1.9005
proline/min (μM/min)	0.529424	0.19005	6.77391	-0.217199	14.1723	1.54755	65.6214	0.868798	3.44804	6.97753	4.19467	41.7295	84.7621	76.2777	78.4497	81.5041	77.2959	87.6128	75.8026	53.4718	84.9657	80.1466	15.937	0.19005
proline/min (U=μmloe/min)	0.000264712	9.50248e-05	0.00338695	-0.0001086	0.00708613	0.000773773	0.0328107	0.000434399	0.00172402	0.00348877	0.00209733	0.0208647	0.042381	0.0381389	0.0392249	0.0407521	0.0386479	0.0438064	0.0379013	0.0267359	0.0424829	0.0400733	0.00796851	9.50248e-05
protein con. (mg)	5.44889	5.44889	5.44889	5.44889	5.44889	5.44889	5.44889	5.44889	5.44889	5.44889	5.44889	5.44889	5.44889	5.44889	5.44889	5.44889	5.44889	5.44889	5.44889	5.44889	5.44889	5.44889	5.44889	5.44889
protein con. in mixture (mg/ml)	0.000544889	0.000544889	0.000544889	0.000544889	0.000544889	0.000544889	0.000544889	0.000544889	0.000544889	0.000544889	0.000544889	0.000544889	0.000544889	0.000544889	0.000544889	0.000544889	0.000544889	0.000544889	0.000544889	0.000544889	0.000544889	0.000544889	0.000544889	0.000544889
specific activity (U/mg)	0.485809	0.174393	6.21586	-0.199306	13.0047	1.42006	60.2154	0.797225	3.16399	6.40271	3.8491	38.2917	77.7792	69.9938	71.9869	74.7896	70.9281	80.3951	69.5579	49.0667	77.9661	73.544	14.6241	0.174393
Relative activity (%)	0.619966	0.222552	7.93239	-0.254345	16.596	1.81221	76.844	1.01738	4.03773	8.17084	4.91204	48.866	99.2582	89.3228	91.8663	95.443	90.515	102.596	88.7664	62.6166	99.4966	93.8533	18.6626	0.222552
error bar	0.442542	0.346458	0.955448	0.796152	1.18026	2.64153	0.449623	0.843043	0.511003	1.23646	0.642452	0.485648	2.64153	0.914341	2.25373	1.57368	2.07925	1.34887	2.12434	1.74229	1.61333	1.51748	0.275337	0.346458

## Sheet: 105.07.05 pHeffect on stability
	2.76	3.18	5.03	3.62	4.34	4.96	5.9	3.99	5	5.98	6	7	8	6.8	7.5	8.2	7	8	8.5	9	8.6	9	10	10.6		2.76	0.721243	0.403054	3.62	-0.357539	0.29724	3.99	0.81371	0.980761	6	3.21785	0.800788	6.8	71.0578	2.61536	7	83.8491	2.41921	8.6	67.8831	2.6948
	0.02	0.02	0.007	0.001	0.013	0.012	0.858	0.017	0.002	0.094	0.047	0.369	0.946	0.825	0.874	0.981	0.865	1.092	0.709	0.273	0.714	0.513	0.045	0.004		3.18	1.4918	2.32704	4.34	0.0123289	0.719225	5	-0.388361	0.160158	7	31.0504	2.11465	7.5	79.9655	3.33459	8	100	2.61536	9	43.7801	0.915377
	0.012	0.05	0.01	0.002	0.002	0.009	0.775	0.008	0.002	0.088	0.032	0.326	0.778	0.771	0.817	0.979	0.92	1.122	0.749	0.258	0.738	0.43	0.057	0.006		5.03	-0.0801381	0.32692	4.96	0.197263	0.196152	5.98	7.87203	0.392304	8	77.7463	2.74613	8.2	90.6608	1.43845	8.5	63.3214	2.61536	10	4.1117	0.564983
	0.013	0	0.002	0.007	0.007	0.007	0.899	0.023	0.005	0.095	0.047	0.334	0.82	0.731	0.925	1.003	0.957	1.052	0.618	0.252	0.772	0.499	0.053	0.007					5.9	77.3764	2.68075										9	23.4681	0.392304	10.6	-0.141783	0.141246
protein (OD 515) avg	0.015	0.0233333	0.00633333	0.00333333	0.00733333	0.00933333	0.844	0.016	0.003	0.0923333	0.042	0.343	0.848	0.775667	0.872	0.987667	0.914	1.08867	0.692	0.261	0.741333	0.480667	0.0516667	0.00566667
	Phosphate-citrate			Sodium-acetate				Sodium-citrate			Sodium-phosphate			Hepes-NaOH			Tris-HCl				Glycine-NAOH
pH	2.76	3.18	5.03	3.62	4.34	4.96	5.9	3.99	5	5.98	6	7	8	6.8	7.5	8.2	7	8	8.5	9	8.6	9	10	10.6
protein (OD 515) avg	0.015	0.0233333	0.00633333	0.00333333	0.00733333	0.00933333	0.844	0.016	0.003	0.0923333	0.042	0.343	0.848	0.775667	0.872	0.987667	0.914	1.08867	0.692	0.261	0.741333	0.480667	0.0516667	0.00566667
proline (μM)	5.29424	10.9505	-0.588249	-2.62449	0.0904998	1.448	567.977	5.97299	-2.85074	57.7841	23.6204	227.924	570.692	521.596	586.982	665.49	615.489	734.044	464.807	172.266	498.292	321.365	30.1817	-1.04075
proline/min (μM/min)	0.529424	1.09505	-0.0588249	-0.262449	0.00904998	0.1448	56.7977	0.597299	-0.285074	5.77841	2.36204	22.7924	57.0692	52.1596	58.6982	66.549	61.5489	73.4044	46.4807	17.2266	49.8292	32.1365	3.01817	-0.104075
proline/min (U=μmloe/min)	0.000264712	0.000547524	-2.94124e-05	-0.000131225	4.52499e-06	7.23998e-05	0.0283988	0.000298649	-0.000142537	0.00288921	0.00118102	0.0113962	0.0285346	0.0260798	0.0293491	0.0332745	0.0307745	0.0367022	0.0232403	0.00861332	0.0249146	0.0160682	0.00150908	-5.20374e-05
protein con. (mg)	5.44889	5.44889	5.44889	5.44889	5.44889	5.44889	5.44889	5.44889	5.44889	5.44889	5.44889	5.44889	5.44889	5.44889	5.44889	5.44889	5.44889	5.44889	5.44889	5.44889	5.44889	5.44889	5.44889	5.44889
protein con. in mixture (mg/ml)	0.000544889	0.000544889	0.000544889	0.000544889	0.000544889	0.000544889	0.000544889	0.000544889	0.000544889	0.000544889	0.000544889	0.000544889	0.000544889	0.000544889	0.000544889	0.000544889	0.000544889	0.000544889	0.000544889	0.000544889	0.000544889	0.000544889	0.000544889	0.000544889
specific activity (U/mg)	0.485809	1.00484	-0.0539788	-0.240828	0.00830442	0.132871	52.1186	0.548092	-0.261589	5.30237	2.16745	20.9147	52.3677	47.8625	53.8625	61.0666	56.4784	67.3572	42.6515	15.8075	45.7242	29.489	2.76953	-0.0955009
Relative activity (%)	0.721243	1.4918	-0.0801381	-0.357539	0.0123289	0.197263	77.3764	0.81371	-0.388361	7.87203	3.21785	31.0504	77.7463	71.0578	79.9655	90.6608	83.8491	100	63.3214	23.4681	67.8831	43.7801	4.1117	-0.141783
protein (OD 515) avg	0.02	0.02	0.007	0.001	0.013	0.012	0.858	0.017	0.002	0.094	0.047	0.369	0.946	0.825	0.874	0.981	0.865	1.092	0.709	0.273	0.714	0.513	0.045	0.004
proline (μM)	8.68798	8.68798	-0.13575	-4.20824	3.93674	3.25799	577.479	6.65173	-3.52949	58.9154	27.0142	245.571	637.209	555.08	588.339	660.965	582.23	736.306	476.346	180.411	479.739	343.311	25.6567	-2.17199
proline/min (μM/min)	0.868798	0.868798	-0.013575	-0.420824	0.393674	0.325799	57.7479	0.665173	-0.352949	5.89154	2.70142	24.5571	63.7209	55.508	58.8339	66.0965	58.223	73.6306	47.6346	18.0411	47.9739	34.3311	2.56567	-0.217199
proline/min (U=μmloe/min)	0.000434399	0.000434399	-6.78748e-06	-0.000210412	0.000196837	0.0001629	0.028874	0.000332587	-0.000176475	0.00294577	0.00135071	0.0122786	0.0318604	0.027754	0.029417	0.0330483	0.0291115	0.0368153	0.0238173	0.00902057	0.023987	0.0171655	0.00128283	-0.0001086
protein con. (mg)	5.44889	5.44889	5.44889	5.44889	5.44889	5.44889	5.44889	5.44889	5.44889	5.44889	5.44889	5.44889	5.44889	5.44889	5.44889	5.44889	5.44889	5.44889	5.44889	5.44889	5.44889	5.44889	5.44889	5.44889
protein con. in mixture (mg/ml)	0.000544889	0.000544889	0.000544889	0.000544889	0.000544889	0.000544889	0.000544889	0.000544889	0.000544889	0.000544889	0.000544889	0.000544889	0.000544889	0.000544889	0.000544889	0.000544889	0.000544889	0.000544889	0.000544889	0.000544889	0.000544889	0.000544889	0.000544889	0.000544889
specific activity (U/mg)	0.797225	0.797225	-0.0124566	-0.386156	0.361242	0.298959	52.9905	0.610375	-0.323873	5.40618	2.47887	22.5341	58.4714	50.9352	53.9871	60.6514	53.4265	67.5648	43.7103	16.5549	44.0218	31.5028	2.3543	-0.199306
Relative activity (%)	1.18358	1.18358	-0.0184934	-0.573296	0.536309	0.443842	78.6709	0.906177	-0.480829	8.02614	3.68019	33.4546	86.808	75.6195	80.1504	90.0444	79.3182	100.308	64.8934	24.5777	65.3557	46.7698	3.49525	-0.295894
protein (OD 515) avg	0.012	0.05	0.01	0.002	0.002	0.009	0.775	0.008	0.002	0.088	0.032	0.326	0.778	0.771	0.817	0.979	0.92	1.122	0.749	0.258	0.738	0.43	0.057	0.006
proline (μM)	3.25799	29.0504	1.9005	-3.52949	-3.52949	1.22175	521.143	0.542999	-3.52949	54.8429	16.833	216.385	523.179	518.428	549.65	659.608	619.562	756.669	503.496	170.23	496.029	286.975	33.8017	-0.814498
proline/min (μM/min)	0.325799	2.90504	0.19005	-0.352949	-0.352949	0.122175	52.1143	0.0542999	-0.352949	5.48429	1.6833	21.6385	52.3179	51.8428	54.965	65.9608	61.9562	75.6669	50.3496	17.023	49.6029	28.6975	3.38017	-0.0814498
proline/min (U=μmloe/min)	0.0001629	0.00145252	9.50248e-05	-0.000176475	-0.000176475	6.10874e-05	0.0260572	2.71499e-05	-0.000176475	0.00274214	0.000841648	0.0108192	0.026159	0.0259214	0.0274825	0.0329804	0.0309781	0.0378334	0.0251748	0.0085115	0.0248015	0.0143487	0.00169008	-4.07249e-05
protein con. (mg)	5.44889	5.44889	5.44889	5.44889	5.44889	5.44889	5.44889	5.44889	5.44889	5.44889	5.44889	5.44889	5.44889	5.44889	5.44889	5.44889	5.44889	5.44889	5.44889	5.44889	5.44889	5.44889	5.44889	5.44889
protein con. in mixture (mg/ml)	0.000544889	0.000544889	0.000544889	0.000544889	0.000544889	0.000544889	0.000544889	0.000544889	0.000544889	0.000544889	0.000544889	0.000544889	0.000544889	0.000544889	0.000544889	0.000544889	0.000544889	0.000544889	0.000544889	0.000544889	0.000544889	0.000544889	0.000544889	0.000544889
specific activity (U/mg)	0.298959	2.66572	0.174393	-0.323873	-0.323873	0.11211	47.821	0.0498265	-0.323873	5.03248	1.54462	19.8559	48.0079	47.5719	50.4369	60.5268	56.8521	69.4333	46.2017	15.6206	45.5165	26.3333	3.1017	-0.0747398
Relative activity (%)	0.443842	3.95759	0.258908	-0.480829	-0.480829	0.166441	70.9962	0.0739736	-0.480829	7.47134	2.29318	29.4785	71.2736	70.6263	74.8798	89.8595	84.4039	103.082	68.592	23.1907	67.5749	39.0951	4.60486	-0.11096
protein (OD 515) avg	0.013	0	0.002	0.007	0.007	0.007	0.899	0.023	0.005	0.095	0.047	0.334	0.82	0.731	0.925	1.003	0.957	1.052	0.618	0.252	0.772	0.499	0.053	0.007
proline (μM)	3.93674	-4.88699	-3.52949	-0.13575	-0.13575	-0.13575	605.308	10.7242	-1.49325	59.5941	27.0142	221.815	551.687	491.278	622.955	675.898	644.675	709.156	414.58	166.158	519.107	333.808	31.0867	-0.13575
proline/min (μM/min)	0.393674	-0.488699	-0.352949	-0.013575	-0.013575	-0.013575	60.5308	1.07242	-0.149325	5.95941	2.70142	22.1815	55.1687	49.1278	62.2955	67.5898	64.4675	70.9156	41.458	16.6158	51.9107	33.3808	3.10867	-0.013575
proline/min (U=μmloe/min)	0.000196837	-0.000244349	-0.000176475	-6.78748e-06	-6.78748e-06	-6.78748e-06	0.0302654	0.000536211	-7.46623e-05	0.00297971	0.00135071	0.0110907	0.0275843	0.0245639	0.0311478	0.0337949	0.0322338	0.0354578	0.020729	0.00830788	0.0259553	0.0166904	0.00155433	-6.78748e-06
protein con. (mg)	5.44889	5.44889	5.44889	5.44889	5.44889	5.44889	5.44889	5.44889	5.44889	5.44889	5.44889	5.44889	5.44889	5.44889	5.44889	5.44889	5.44889	5.44889	5.44889	5.44889	5.44889	5.44889	5.44889	5.44889
protein con. in mixture (mg/ml)	0.000544889	0.000544889	0.000544889	0.000544889	0.000544889	0.000544889	0.000544889	0.000544889	0.000544889	0.000544889	0.000544889	0.000544889	0.000544889	0.000544889	0.000544889	0.000544889	0.000544889	0.000544889	0.000544889	0.000544889	0.000544889	0.000544889	0.000544889	0.000544889
specific activity (U/mg)	0.361242	-0.448439	-0.323873	-0.0124566	-0.0124566	-0.0124566	55.5441	0.984074	-0.137023	5.46846	2.47887	20.3541	50.6238	45.0806	57.1635	62.0216	59.1566	65.0735	38.0426	15.2469	47.6342	30.6309	2.85257	-0.0124566
Relative activity (%)	0.536309	-0.665763	-0.480829	-0.0184934	-0.0184934	-0.0184934	82.4621	1.46098	-0.203427	8.1186	3.68019	30.2182	75.1572	66.9276	84.8662	92.0787	87.8252	96.6095	56.4789	22.6359	70.7188	45.4753	4.23499	-0.0184934
error bar	0.403054	2.32704	0.32692	0.29724	0.719225	0.196152	2.68075	0.980761	0.160158	0.392304	0.800788	2.11465	2.74613	2.61536	3.33459	1.43845	2.41921	2.61536	2.61536	0.392304	2.6948	0.915377	0.564983	0.141246
