# Supplementary material for: High-level expression and molecular characterization of a recombinant prolidase from Escherichia coli NovaBlue
Source: PeerJ. 2018 Oct 31;6:e5863. doi: 10.7717/peerj.5863 (PMC6215446; doi:10.7717/peerj.5863)
Supplement: Supplemental Information 9 [file peerj-06-5863-s009.xls]

## Sheet: 105.01.27 200x
Specific activity				different con. Of Mn2+	0	0.002	0.004	0.006	0.008	0.01	0.02	0.03	0.04	0.05	0.06	0.07	0.08	0.09	0.1	0.15	0.2	0.3	0.4	0.5
standard curve of protein：y = 0.0009x + 0.0456					0.025	0.318	0.569	0.697	0.745	0.757	0.938	1.052	1.051	1.107	1.073	1.088	1.105	1.116	1.157	1.083	1.098	1.05	1.03	1.009
standard curve of Proline：y = 1.4733x+0.0072				protein (OD 515)	0.03	0.38	0.568	0.695	0.743	0.734	0.935	1.053	1.055	1.087	1.097	1.083	1.108	1.112	1.153	1.11	1.095	1.068	1.042	1.006
					0.026	0.39	0.567	0.682	0.743	0.802	0.952	1.053	1.059	1.088	1.12	1.087	1.102	1.115	1.125	1.086	1.093	1.069	1.039	0.995
	0.512			protein (OD 515) avg	0.027	0.362667	0.568	0.691333	0.743667	0.764333	0.941667	1.05267	1.055	1.094	1.09667	1.086	1.105	1.11433	1.145	1.093	1.09533	1.06233	1.037	1.00333
1/19 purified protein	0.538			proline (μM)	23.2132	251.046	390.416	474.128	509.65	523.677	644.042	719.383	720.967	747.438	749.248	742.008	754.904	761.239	782.054	746.759	748.343	725.944	708.749	685.898
	0.558			proline/min (μM/min)	2.32132	25.1046	39.0416	47.4128	50.965	52.3677	64.4042	71.9383	72.0967	74.7438	74.9248	74.2008	75.4904	76.1239	78.2054	74.6759	74.8343	72.5944	70.8749	68.5898
AVG	0.536			proline/min (U=μmloe/min)	0.00116066	0.0125523	0.0195208	0.0237064	0.0254825	0.0261839	0.0322021	0.0359691	0.0360483	0.0373719	0.0374624	0.0371004	0.0377452	0.0380619	0.0391027	0.0373379	0.0374171	0.0362972	0.0354375	0.0342949
protein con. (mg)	5.44889			protein con. (mg)	5.4489	5.4489	5.4489	5.4489	5.4489	5.4489	5.4489	5.4489	5.4489	5.4489	5.4489	5.4489	5.4489	5.4489	5.4489	5.4489	5.4489	5.4489	5.4489	5.4489
				protein con. in mixture (mg/ml)	0.00054489	0.00054489	0.00054489	0.00054489	0.00054489	0.00054489	0.00054489	0.00054489	0.00054489	0.00054489	0.00054489	0.00054489	0.00054489	0.00054489	0.00054489	0.00054489	0.00054489	0.00054489	0.00054489	0.00054489
				specific activity (U/mg)	2.13008	23.0364	35.8252	43.5068	46.7663	48.0535	59.0983	66.0117	66.1571	68.5861	68.7522	68.0878	69.2712	69.8525	71.7625	68.5238	68.6692	66.6138	65.036	62.9391
				Relative activity (%)	2.96823	32.1009	49.9219	60.626	65.1681	66.9618	82.3526	91.9863	92.1889	95.5737	95.8051	94.8794	96.5284	97.3384	100	95.4869	95.6894	92.8253	90.6266	87.7047
				protein (OD 515) avg	0.025	0.318	0.569	0.697	0.745	0.757	0.938	1.052	1.051	1.107	1.073	1.088	1.105	1.116	1.157	1.083	1.098	1.05	1.03	1.009
				proline (μM)	21.8557	220.729	391.095	477.975	510.555	518.7	641.553	718.93	718.252	756.261	733.184	743.365	754.904	762.37	790.199	739.971	750.153	717.573	703.998	689.744
				proline/min (μM/min)	2.18557	22.0729	39.1095	47.7975	51.0555	51.87	64.1553	71.893	71.8252	75.6261	73.3184	74.3365	75.4904	76.237	79.0199	73.9971	75.0153	71.7573	70.3998	68.9744
				proline/min (U=μmloe/min)	0.00109278	0.0110364	0.0195547	0.0238987	0.0255277	0.025935	0.0320776	0.0359465	0.0359126	0.0378131	0.0366592	0.0371683	0.0377452	0.0381185	0.0395099	0.0369986	0.0375076	0.0358786	0.0351999	0.0344872
				protein con. (mg)	5.4489	5.4489	5.4489	5.4489	5.4489	5.4489	5.4489	5.4489	5.4489	5.4489	5.4489	5.4489	5.4489	5.4489	5.4489	5.4489	5.4489	5.4489	5.4489	5.4489
				protein con. in mixture (mg/ml)	0.00054489	0.00054489	0.00054489	0.00054489	0.00054489	0.00054489	0.00054489	0.00054489	0.00054489	0.00054489	0.00054489	0.00054489	0.00054489	0.00054489	0.00054489	0.00054489	0.00054489	0.00054489	0.00054489	0.00054489
				specific activity (U/mg)	2.00551	20.2545	35.8875	43.8597	46.8493	47.5967	58.87	65.9702	65.9079	69.3958	67.2782	68.2124	69.2712	69.9563	72.5099	67.901	68.8352	65.8457	64.6	63.2921
				Relative activity (%)	2.87107	28.996	51.3761	62.789	67.0689	68.1389	84.2775	94.4421	94.353	99.3461	96.3146	97.652	99.1678	100.149	103.804	97.2062	98.5437	94.2638	92.4805	90.6081
				protein (OD 515) avg	0.03	0.38	0.568	0.695	0.743	0.734	0.935	1.053	1.055	1.087	1.097	1.083	1.108	1.112	1.153	1.11	1.095	1.068	1.042	1.006
				proline (μM)	25.2494	262.811	390.416	476.617	509.197	503.088	639.517	719.609	720.967	742.686	749.474	739.971	756.94	759.655	787.484	758.298	748.116	729.79	712.143	687.708
				proline/min (μM/min)	2.52494	26.2811	39.0416	47.6617	50.9197	50.3088	63.9517	71.9609	72.0967	74.2686	74.9474	73.9971	75.694	75.9655	78.7484	75.8298	74.8116	72.979	71.2143	68.7708
				proline/min (U=μmloe/min)	0.00126247	0.0131406	0.0195208	0.0238309	0.0254599	0.0251544	0.0319758	0.0359805	0.0360483	0.0371343	0.0374737	0.0369986	0.037847	0.0379828	0.0393742	0.0379149	0.0374058	0.0364895	0.0356071	0.0343854
				protein con. (mg)	5.4489	5.4489	5.4489	5.4489	5.4489	5.4489	5.4489	5.4489	5.4489	5.4489	5.4489	5.4489	5.4489	5.4489	5.4489	5.4489	5.4489	5.4489	5.4489	5.4489
				protein con. in mixture (mg/ml)	0.00054489	0.00054489	0.00054489	0.00054489	0.00054489	0.00054489	0.00054489	0.00054489	0.00054489	0.00054489	0.00054489	0.00054489	0.00054489	0.00054489	0.00054489	0.00054489	0.00054489	0.00054489	0.00054489	0.00054489
				specific activity (U/mg)	2.31693	24.116	35.8252	43.7352	46.7248	46.1642	58.6831	66.0325	66.1571	68.1501	68.773	67.901	69.4581	69.7072	72.2608	69.5826	68.6484	66.9668	65.3474	63.1052
				Relative activity (%)	3.31689	34.5242	51.2869	62.6107	66.8906	66.0881	84.01	94.5313	94.7096	97.5629	98.4545	97.2062	99.4353	99.792	103.448	99.6136	98.2762	95.8688	93.5505	90.3406
				protein (OD 515) avg	0.026	0.39	0.567	0.682	0.743	0.802	0.952	1.053	1.059	1.088	1.12	1.087	1.102	1.115	1.125	1.086	1.093	1.069	1.039	0.995
				proline (μM)	22.5344	269.599	389.737	467.793	509.197	549.243	651.055	719.609	723.682	743.365	765.085	742.686	752.868	761.691	768.479	742.008	746.759	730.469	710.107	680.242
				proline/min (μM/min)	2.25344	26.9599	38.9737	46.7793	50.9197	54.9243	65.1055	71.9609	72.3682	74.3365	76.5085	74.2686	75.2868	76.1691	76.8479	74.2008	74.6759	73.0469	71.0107	68.0242
				proline/min (U=μmloe/min)	0.00112672	0.0134799	0.0194869	0.0233897	0.0254599	0.0274622	0.0325528	0.0359805	0.0361841	0.0371683	0.0382543	0.0371343	0.0376434	0.0380846	0.0384239	0.0371004	0.0373379	0.0365235	0.0355053	0.0340121
				protein con. (mg)	5.4489	5.4489	5.4489	5.4489	5.4489	5.4489	5.4489	5.4489	5.4489	5.4489	5.4489	5.4489	5.4489	5.4489	5.4489	5.4489	5.4489	5.4489	5.4489	5.4489
				protein con. in mixture (mg/ml)	0.00054489	0.00054489	0.00054489	0.00054489	0.00054489	0.00054489	0.00054489	0.00054489	0.00054489	0.00054489	0.00054489	0.00054489	0.00054489	0.00054489	0.00054489	0.00054489	0.00054489	0.00054489	0.00054489	0.00054489
				specific activity (U/mg)	2.0678	24.7388	35.7629	42.9255	46.7248	50.3995	59.7419	66.0325	66.4062	68.2124	70.2055	68.1501	69.0844	69.8941	70.5169	68.0878	68.5238	67.029	65.1605	62.4201
				Relative activity (%)	2.96023	35.4158	51.1978	61.4516	66.8906	72.1512	85.5258	94.5313	95.0663	97.652	100.505	97.5629	98.9003	100.059	100.951	97.4737	98.0978	95.9579	93.283	89.3598
				error bar	0.235905	3.47776	0.0891636	0.726196	0.102957	3.084	0.809051	0.0514787	0.356655	1.00482	2.0955	0.235905	0.267491	0.185609	1.55462	1.3195	0.22439	0.953398	0.556827	0.657235
					0	2.96823	0.235905
					0.002	32.1009	3.47776
					0.004	49.9219	0.0891636
					0.006	60.626	0.726196
					0.008	65.1681	0.102957
					0.01	66.9618	3.084
					0.02	82.3526	0.809051
					0.04	92.1889	0.356655
					0.06	95.8051	2.0955
					0.08	96.5284	0.267491
					0.1	100	1.55462
					0.15	95.4869	1.3195
					0.2	95.6894	0.22439
					0.3	92.8253	0.953398
					0.4	90.6266	0.556827
					0.5	87.7047	0.657235
