# Supplementary material for: High-level expression and molecular characterization of a recombinant prolidase from Escherichia coli NovaBlue
Source: PeerJ. 2018 Oct 31;6:e5863. doi: 10.7717/peerj.5863 (PMC6215446; doi:10.7717/peerj.5863)
Supplement: Supplemental Information 10 [file peerj-06-5863-s010.xls]

## Sheet: 105.02.02 CD
XYDATA	0.5℃ (20-90)	1℃(20-90)	2℃(20-90)	2℃(90-20)		concentration of enzyme	0.5℃(20-90)	1℃(20-90)	2℃(20-90)	2℃(90-20)
20	-18.4684	-18.5658	-18.9072	-13.6824		2.93295e-06	-6.29686	-6.33007	-6.44647	-4.66506
21	-18.7581	-19.1274	-18.5865	-13.6976		2.93295e-06	-6.39564	-6.52155	-6.33713	-4.67024
22	-19.8364	-17.9902	-18.5509	-14.113		2.93295e-06	-6.76329	-6.13382	-6.32499	-4.81187
23	-18.9984	-19.0867	-18.8874	-14.2014		2.93295e-06	-6.47757	-6.50767	-6.43972	-4.84201
24	-18.1947	-18.3414	-18.2811	-14.2814		2.93295e-06	-6.20354	-6.25356	-6.233	-4.86929
25	-18.1173	-17.9532	-19.2612	-14.0407		2.93295e-06	-6.17715	-6.1212	-6.56717	-4.78722
26	-19.5083	-18.3137	-18.3984	-13.9323		2.93295e-06	-6.65142	-6.24412	-6.273	-4.75026
27	-18.4135	-18.9704	-18.121	-13.9922		2.93295e-06	-6.27814	-6.46802	-6.17842	-4.77069
28	-18.4075	-18.4957	-18.5049	-15.2672		2.93295e-06	-6.2761	-6.30617	-6.30931	-5.2054
29	-19.0836	-18.6607	-18.0871	-14.0216		2.93295e-06	-6.50662	-6.36243	-6.16686	-4.78071
30	-19.0662	-19.0579	-17.0963	-14.8293		2.93295e-06	-6.50068	-6.49785	-5.82904	-5.0561
31	-18.2613	-17.5848	-19.2404	-13.619		2.93295e-06	-6.22625	-5.9956	-6.56008	-4.64344
32	-19.2044	-18.2607	-17.8395	-15.0606		2.93295e-06	-6.5478	-6.22605	-6.08244	-5.13496
33	-17.9703	-18.4626	-17.8455	-14.0734		2.93295e-06	-6.12703	-6.29489	-6.08448	-4.79837
34	-18.5109	-17.8581	-18.1005	-14.0773		2.93295e-06	-6.31135	-6.08878	-6.17143	-4.7997
35	-17.8412	-17.5493	-19.2203	-13.4216		2.93295e-06	-6.08302	-5.98349	-6.55323	-4.57614
36	-19.0795	-17.8573	-18.0889	-14.0673		2.93295e-06	-6.50522	-6.08851	-6.16747	-4.79629
37	-18.5298	-19.3964	-18.629	-14.2189		2.93295e-06	-6.3178	-6.61327	-6.35162	-4.84798
38	-17.5039	-18.316	-18.7594	-13.945		2.93295e-06	-5.96801	-6.2449	-6.39608	-4.75459
39	-18.4213	-17.4821	-17.9321	-14.7311		2.93295e-06	-6.2808	-5.96058	-6.11401	-5.02262
40	-18.1882	-18.7284	-18.5466	-12.8446		2.93295e-06	-6.20133	-6.38551	-6.32353	-4.37941
41	-18.5782	-17.1404	-18.3451	-14.0521		2.93295e-06	-6.3343	-5.84408	-6.25482	-4.79111
42	-18.8086	-18.3816	-17.5451	-14.3201		2.93295e-06	-6.41285	-6.26727	-5.98206	-4.88249
43	-18.2918	-17.7899	-18.0427	-14.2869		2.93295e-06	-6.23665	-6.06553	-6.15172	-4.87117
44	-17.7068	-18.5526	-18.9973	-14.3134		2.93295e-06	-6.03719	-6.32557	-6.47719	-4.8802
45	-17.8918	-18.5072	-18.4447	-13.6124		2.93295e-06	-6.10027	-6.31009	-6.28878	-4.64119
46	-19.3634	-17.8012	-17.6401	-15.0884		2.93295e-06	-6.60202	-6.06938	-6.01445	-5.14444
47	-18.1811	-17.5077	-18.0601	-14.2556		2.93295e-06	-6.19891	-5.96931	-6.15765	-4.86049
48	-18.4601	-18.2071	-18.2978	-13.9593		2.93295e-06	-6.29403	-6.20777	-6.2387	-4.75947
49	-18.0189	-16.7161	-18.1885	-12.3565		2.93295e-06	-6.1436	-5.69941	-6.20143	-4.21299
50	-17.6737	-18.4975	-17.2227	-15.475		2.93295e-06	-6.02591	-6.30678	-5.87214	-5.27625
51	-18.0926	-18.8425	-17.5601	-13.9062		2.93295e-06	-6.16873	-6.42441	-5.98717	-4.74137
52	-17.7789	-19.1812	-16.4992	-14.2157		2.93295e-06	-6.06178	-6.53989	-5.62546	-4.84689
53	-18.8413	-17.1007	-18.213	-14.4002		2.93295e-06	-6.424	-5.83054	-6.20978	-4.9098
54	-18.542	-18.1868	-17.3168	-14.5053		2.93295e-06	-6.32196	-6.20085	-5.90422	-4.94563
55	-17.1193	-18.2542	-17.833	-12.9422		2.93295e-06	-5.83688	-6.22383	-6.08022	-4.41269
56	-17.4569	-17.0424	-16.3444	-13.8484		2.93295e-06	-5.95199	-5.81066	-5.57268	-4.72166
57	-17.1058	-17.272	-17.897	-13.2497		2.93295e-06	-5.83228	-5.88895	-6.10204	-4.51753
58	-17.7499	-17.4424	-18.3302	-14.3514		2.93295e-06	-6.05189	-5.94704	-6.24974	-4.89316
59	-17.9416	-17.6324	-17.6048	-13.3794		2.93295e-06	-6.11725	-6.01183	-6.00242	-4.56175
60	-17.7164	-16.9623	-18.0184	-12.6542		2.93295e-06	-6.04047	-5.78335	-6.14343	-4.31449
61	-17.315	-17.2481	-17.6686	-15.6711		2.93295e-06	-5.90361	-5.8808	-6.02417	-5.34311
62	-16.4768	-18.0486	-17.1152	-15.5535		2.93295e-06	-5.61782	-6.15373	-5.83548	-5.30302
63	-15.7401	-16.3774	-17.3016	-14.4516		2.93295e-06	-5.36664	-5.58393	-5.89904	-4.92732
64	-15.2729	-15.8995	-15.9722	-15.3529		2.93295e-06	-5.20735	-5.42099	-5.44577	-5.23462
65	-15.3137	-15.5747	-16.0457	-14.4237		2.93295e-06	-5.22126	-5.31025	-5.47083	-4.91781
66	-16.6342	-15.1307	-16.2847	-14.9579		2.93295e-06	-5.67149	-5.15886	-5.55232	-5.09995
67	-16.3339	-16.3281	-14.2911	-14.8485		2.93295e-06	-5.5691	-5.56712	-4.8726	-5.06265
68	-16.2055	-14.9177	-14.6005	-14.0996		2.93295e-06	-5.52532	-5.08624	-4.97809	-4.80731
69	-15.2819	-15.0951	-15.8553	-14.724		2.93295e-06	-5.21041	-5.14672	-5.40592	-5.0202
70	-14.0994	-14.8106	-14.1839	-13.3236		2.93295e-06	-4.80724	-5.04972	-4.83605	-4.54273
71	-15.6545	-13.8091	-14.1807	-15.1625		2.93295e-06	-5.33745	-4.70826	-4.83496	-5.1697
72	-15.1424	-15.0669	-14.8049	-14.6563		2.93295e-06	-5.16285	-5.13711	-5.04778	-4.99711
73	-14.5021	-15.7527	-15.6629	-13.7531		2.93295e-06	-4.94454	-5.37094	-5.34032	-4.68917
74	-14.6194	-14.6696	-14.6903	-14.8331		2.93295e-06	-4.98453	-5.00165	-5.00871	-5.05739
75	-15.1626	-14.3512	-14.2686	-13.9947		2.93295e-06	-5.16974	-4.89309	-4.86493	-4.77154
76	-14.4296	-14.2167	-14.8439	-13.9496		2.93295e-06	-4.91982	-4.84723	-5.06108	-4.75616
77	-13.5925	-14.2592	-14.6537	-14.0883		2.93295e-06	-4.63441	-4.86172	-4.99623	-4.80345
78	-14.7596	-15.5145	-14.0646	-15.8335		2.93295e-06	-5.03233	-5.28972	-4.79537	-5.39848
79	-14.8819	-14.3657	-15.1943	-14.7119		2.93295e-06	-5.07403	-4.89803	-5.18055	-5.01607
80	-13.6411	-14.6352	-14.1723	-14.7179		2.93295e-06	-4.65098	-4.98992	-4.83209	-5.01812
81	-13.8965	-13.2484	-14.3569	-15.4391		2.93295e-06	-4.73806	-4.51709	-4.89503	-5.26401
82	-13.0273	-14.4825	-13.983	-14.0786		2.93295e-06	-4.4417	-4.93786	-4.76755	-4.80015
83	-13.2272	-13.7261	-14.1712	-14.4184		2.93295e-06	-4.50986	-4.67996	-4.83172	-4.916
84	-14.072	-14.514	-13.2806	-14.2506		2.93295e-06	-4.7979	-4.9486	-4.52806	-4.85879
85	-13.5087	-14.3769	-13.3163	-14.5018		2.93295e-06	-4.60584	-4.90185	-4.54024	-4.94444
86	-14.8133	-14.3131	-13.9496	-14.6102		2.93295e-06	-5.05064	-4.8801	-4.75616	-4.9814
87	-14.6445	-13.473	-13.8024	-13.9965		2.93295e-06	-4.99309	-4.59366	-4.70597	-4.77215
88	-14.1729	-13.2728	-14.5506	-13.9694		2.93295e-06	-4.8323	-4.52541	-4.96108	-4.76291
89	-13.7893	-14.9399	-13.3551	-15.297		2.93295e-06	-4.70151	-5.09381	-4.55347	-5.21556
90	-13.0918	-13.9573	-14.8083	-13.3746		2.93295e-06	-4.46369	-4.75879	-5.04894	-4.56011

## Sheet: 105.02.02 CD smooth
smooth(10)	XYDATA	0.5℃(20-90)	1℃(20-90)	2℃(20-90)	2℃(90-20)		con. Of enzyme	0.5℃(20-90)	1℃(20-90)	2℃(20-90)	2℃(90-20)		smooth(15)	XYDATA	0.5℃(20-90)	1℃(20-90)	2℃(20-90)	2℃(90-20)	90-20(smooth20)		con. Of enzyme	0.5℃(20-90)	1℃(20-90)	2℃(20-90)	2℃(90-20)	90-20(smooth20)
	20	-18.6811	-18.5972	-18.7602	-13.8562		2.93295e-06	-6.36938	-6.34078	-6.39635	-4.72432			20	-18.6383	-18.554	-18.7563	-13.8479	-13.9468		2.93295e-06	-6.35479	-6.32605	-6.39502	-4.72149	-4.75521
	21	-18.6421	-18.5291	-18.7995	-13.896		2.93295e-06	-6.35609	-6.31756	-6.40975	-4.73789			21	-18.6342	-18.5493	-18.7295	-13.9535	-13.9438		2.93295e-06	-6.35339	-6.32445	-6.38589	-4.75749	-4.75419
	22	-18.7576	-18.5011	-18.743	-13.9237		2.93295e-06	-6.39547	-6.30801	-6.39049	-4.74733			22	-18.6752	-18.5556	-18.6748	-13.9761	-14.0094		2.93295e-06	-6.36737	-6.32659	-6.36724	-4.7652	-4.77655
	23	-18.7515	-18.5461	-18.6557	-13.9582		2.93295e-06	-6.39339	-6.32335	-6.36072	-4.75909			23	-18.7151	-18.5884	-18.5541	-14.0526	-14.028		2.93295e-06	-6.38098	-6.33778	-6.32608	-4.79128	-4.78289
	24	-18.7447	-18.5383	-18.611	-14.1342		2.93295e-06	-6.39107	-6.3207	-6.34548	-4.8191			24	-18.7013	-18.523	-18.5763	-14.0484	-14.0468		2.93295e-06	-6.37627	-6.31548	-6.33365	-4.78985	-4.7893
	25	-18.8131	-18.5488	-18.5198	-14.1719		2.93295e-06	-6.41439	-6.32428	-6.31439	-4.83196			25	-18.7503	-18.5027	-18.5051	-14.1402	-14.0344		2.93295e-06	-6.39298	-6.30856	-6.30938	-4.82115	-4.78508
	26	-18.8473	-18.5411	-18.3543	-14.2977		2.93295e-06	-6.42605	-6.32165	-6.25796	-4.87485			26	-18.7171	-18.4958	-18.4343	-14.1663	-14.0528		2.93295e-06	-6.38166	-6.3062	-6.28524	-4.83005	-4.79135
	27	-18.6723	-18.4961	-18.4309	-14.2428		2.93295e-06	-6.36638	-6.30631	-6.28408	-4.85613			27	-18.72	-18.4486	-18.3805	-14.1926	-14.0783		2.93295e-06	-6.38265	-6.29011	-6.26689	-4.83901	-4.80004
	28	-18.6952	-18.4043	-18.3144	-14.3383		2.93295e-06	-6.37419	-6.27501	-6.24436	-4.88869			28	-18.6781	-18.3809	-18.4014	-14.1752	-14.0908		2.93295e-06	-6.36836	-6.26703	-6.27402	-4.83308	-4.80431
	29	-18.6703	-18.4177	-18.266	-14.3151		2.93295e-06	-6.3657	-6.27958	-6.22785	-4.88078			29	-18.6996	-18.2962	-18.3682	-14.1999	-14.1407		2.93295e-06	-6.37569	-6.23815	-6.2627	-4.8415	-4.82132
	30	-18.714	-18.4072	-18.1371	-14.3192		2.93295e-06	-6.3806	-6.276	-6.1839	-4.88218			30	-18.6125	-18.3899	-18.3734	-14.2069	-14.1009		2.93295e-06	-6.34599	-6.2701	-6.26447	-4.84389	-4.80775
	31	-18.5288	-18.3222	-18.2284	-14.2625		2.93295e-06	-6.31746	-6.24702	-6.21503	-4.86285			31	-18.5128	-18.3385	-18.3649	-14.1899	-14.1185		2.93295e-06	-6.312	-6.25257	-6.26157	-4.83809	-4.81375
	32	-18.6028	-18.1986	-18.2248	-14.2708		2.93295e-06	-6.34269	-6.20487	-6.21381	-4.86568			32	-18.5279	-18.2813	-18.3416	-14.2198	-14.1481		2.93295e-06	-6.31715	-6.23307	-6.25363	-4.84829	-4.82384
	33	-18.6164	-18.2986	-18.2386	-14.1543		2.93295e-06	-6.34732	-6.23897	-6.21851	-4.82596			33	-18.5327	-18.3329	-18.294	-14.1401	-14.1564		2.93295e-06	-6.31879	-6.25066	-6.2374	-4.82111	-4.82667
	34	-18.4408	-18.2603	-18.3133	-14.1458		2.93295e-06	-6.28745	-6.22591	-6.24398	-4.82306			34	-18.4707	-18.2547	-18.2904	-14.1481	-14.1617		2.93295e-06	-6.29765	-6.224	-6.23617	-4.82384	-4.82848
	35	-18.3692	-18.0853	-18.4062	-14.1349		2.93295e-06	-6.26304	-6.16624	-6.27566	-4.81934			35	-18.497	-18.2155	-18.252	-14.1699	-14.1299		2.93295e-06	-6.30661	-6.21064	-6.22308	-4.83127	-4.81764
	36	-18.3611	-18.2123	-18.3291	-14.0489		2.93295e-06	-6.26028	-6.20954	-6.24937	-4.79002			36	-18.4893	-18.1684	-18.2212	-14.1046	-14.1797		2.93295e-06	-6.30399	-6.19458	-6.21258	-4.80901	-4.83462
	37	-18.2915	-18.0878	-18.3853	-13.9368		2.93295e-06	-6.23655	-6.1671	-6.26853	-4.7518			37	-18.3975	-18.1612	-18.2819	-14.124	-14.1951		2.93295e-06	-6.27269	-6.19212	-6.23327	-4.81562	-4.83987
	38	-18.3846	-18.0788	-18.3519	-13.9642		2.93295e-06	-6.26829	-6.16403	-6.25714	-4.76114			38	-18.3192	-18.1245	-18.3718	-14.0429	-14.1936		2.93295e-06	-6.24599	-6.17961	-6.26393	-4.78797	-4.83936
	39	-18.3603	-18.0713	-18.3455	-13.9875		2.93295e-06	-6.26001	-6.16147	-6.25496	-4.76908			39	-18.3927	-18.1389	-18.2651	-14.1409	-14.055		2.93295e-06	-6.27105	-6.18452	-6.22755	-4.82139	-4.7921
	40	-18.3453	-18.1827	-18.3207	-14.0866		2.93295e-06	-6.25489	-6.19945	-6.2465	-4.80287			40	-18.3245	-18.0887	-18.2798	-14.0872	-14.1242		2.93295e-06	-6.2478	-6.1674	-6.23256	-4.80308	-4.81569
	41	-18.2134	-18.255	-18.3602	-14.0361		2.93295e-06	-6.20992	-6.2241	-6.25997	-4.78566			41	-18.3571	-18.0717	-18.31	-14.0796	-14.0802		2.93295e-06	-6.25891	-6.16161	-6.24286	-4.80049	-4.80069
	42	-18.306	-18.0777	-18.2503	-14.1327		2.93295e-06	-6.24149	-6.16365	-6.2225	-4.81859			42	-18.3243	-17.9956	-18.3158	-13.9649	-14.1086		2.93295e-06	-6.24773	-6.13566	-6.24483	-4.76138	-4.81037
	43	-18.3812	-17.9879	-18.1726	-14.1672		2.93295e-06	-6.26713	-6.13303	-6.19601	-4.83035			43	-18.3131	-18.0588	-18.1827	-14.1018	-14.0772		2.93295e-06	-6.24391	-6.15721	-6.19945	-4.80806	-4.79967
	44	-18.3856	-18.0685	-18.2133	-14.0814		2.93295e-06	-6.26863	-6.16052	-6.20989	-4.8011			44	-18.2473	-18.1244	-18.1474	-14.091	-14.0978		2.93295e-06	-6.22148	-6.17957	-6.18742	-4.80437	-4.80669
	45	-18.3667	-17.8449	-18.1735	-14.0272		2.93295e-06	-6.26219	-6.08428	-6.19632	-4.78262			45	-18.1973	-18.1101	-18.0054	-14.0908	-14.0437		2.93295e-06	-6.20443	-6.1747	-6.139	-4.80431	-4.78825
	46	-18.2662	-17.9957	-18.0488	-14.1853		2.93295e-06	-6.22792	-6.13569	-6.1538	-4.83653			46	-18.2864	-18.0291	-17.969	-14.1212	-14.064		2.93295e-06	-6.23481	-6.14708	-6.12659	-4.81467	-4.79517
	47	-18.1867	-18.0469	-18.0504	-14.1393		2.93295e-06	-6.20082	-6.15315	-6.15434	-4.82084			47	-18.2945	-18.0761	-17.928	-14.1061	-14.0251		2.93295e-06	-6.23757	-6.16311	-6.11261	-4.80952	-4.7819
	48	-18.1297	-18.2015	-17.8789	-14.1314		2.93295e-06	-6.18138	-6.20586	-6.09587	-4.81815			48	-18.2232	-18.0444	-17.8804	-14.1126	-14.0314		2.93295e-06	-6.21326	-6.1523	-6.09638	-4.81174	-4.78405
	49	-18.2558	-18.0401	-17.7918	-14.141		2.93295e-06	-6.22438	-6.15083	-6.06617	-4.82142			49	-18.1485	-18.0379	-17.747	-14.099	-14.0045		2.93295e-06	-6.18779	-6.15008	-6.0509	-4.8071	-4.77488
	50	-18.328	-18.0045	-17.6665	-14.2402		2.93295e-06	-6.24899	-6.13869	-6.02345	-4.85524			50	-18.035	-17.9639	-17.7705	-14.0277	-13.9056		2.93295e-06	-6.14909	-6.12485	-6.05891	-4.78279	-4.74116
	51	-18.0787	-18.0549	-17.6879	-14.0018		2.93295e-06	-6.16399	-6.15588	-6.03075	-4.77396			51	-17.9988	-17.9408	-17.7897	-14.032	-14.0402		2.93295e-06	-6.13675	-6.11698	-6.06546	-4.78426	-4.78705
	52	-17.9982	-18.0032	-17.4973	-13.9565		2.93295e-06	-6.13655	-6.13825	-5.96576	-4.75852			52	-18.0145	-17.8794	-17.6968	-13.9697	-14.1117		2.93295e-06	-6.1421	-6.09604	-6.03378	-4.76302	-4.81143
	53	-17.8477	-17.8993	-17.4527	-13.8777		2.93295e-06	-6.08523	-6.10283	-5.95056	-4.73165			53	-18.0028	-17.7764	-17.6684	-13.9058	-14.1179		2.93295e-06	-6.13811	-6.06092	-6.0241	-4.74123	-4.81355
	54	-17.8178	-17.98	-17.4685	-14.0993		2.93295e-06	-6.07504	-6.13034	-5.95594	-4.8072			54	-17.8662	-17.7396	-17.6703	-13.9447	-14.1687		2.93295e-06	-6.09154	-6.04838	-6.02475	-4.75449	-4.83087
	55	-17.8476	-17.8838	-17.5109	-13.8665		2.93295e-06	-6.0852	-6.09754	-5.9704	-4.72783			55	-17.7526	-17.7756	-17.6073	-14.0312	-14.1739		2.93295e-06	-6.05281	-6.06065	-6.00327	-4.78398	-4.83264
	56	-17.8058	-17.6749	-17.5619	-13.7274		2.93295e-06	-6.07095	-6.02632	-5.98779	-4.6804			56	-17.5713	-17.6536	-17.5409	-14.064	-14.238		2.93295e-06	-5.99099	-6.01905	-5.98063	-4.79517	-4.85449
	57	-17.7542	-17.4601	-17.6918	-13.8891		2.93295e-06	-6.05335	-5.95308	-6.03208	-4.73553			57	-17.3882	-17.5992	-17.3931	-14.2638	-14.2266		2.93295e-06	-5.92856	-6.00051	-5.93024	-4.86329	-4.85061
	58	-17.4915	-17.5655	-17.5698	-14.0172		2.93295e-06	-5.96379	-5.98902	-5.99048	-4.77921			58	-17.2309	-17.4043	-17.3147	-14.1937	-14.2192		2.93295e-06	-5.87493	-5.93405	-5.9035	-4.83939	-4.84808
	59	-17.1802	-17.3644	-17.5681	-14.0113		2.93295e-06	-5.85765	-5.92045	-5.9899	-4.7772			59	-17.1337	-17.1569	-17.2297	-14.2638	-14.2556		2.93295e-06	-5.84179	-5.8497	-5.87452	-4.86329	-4.86049
	60	-16.975	-17.1028	-17.3614	-14.2791		2.93295e-06	-5.78768	-5.83126	-5.91943	-4.86851			60	-17.0373	-16.9667	-17.0824	-14.306	-14.3016		2.93295e-06	-5.80892	-5.78485	-5.8243	-4.87768	-4.87618
	61	-16.7369	-16.9397	-17.3282	-14.3431		2.93295e-06	-5.7065	-5.77565	-5.90811	-4.89033			61	-16.8616	-16.8212	-16.8416	-14.286	-14.2867		2.93295e-06	-5.74902	-5.73524	-5.7422	-4.87086	-4.8711
	62	-16.6845	-16.7018	-17.149	-14.5329		2.93295e-06	-5.68864	-5.69453	-5.84701	-4.95504			62	-16.6443	-16.615	-16.7442	-14.3005	-14.3225		2.93295e-06	-5.67493	-5.66494	-5.70899	-4.8758	-4.8833
	63	-16.5272	-16.578	-16.7003	-14.5881		2.93295e-06	-5.635	-5.65232	-5.69402	-4.97386			63	-16.4429	-16.3855	-16.5009	-14.326	-14.3004		2.93295e-06	-5.60626	-5.58669	-5.62604	-4.8845	-4.87577
	64	-16.3343	-16.2763	-16.3664	-14.6681		2.93295e-06	-5.56923	-5.54946	-5.58018	-5.00114			64	-16.3228	-16.1699	-16.3567	-14.4136	-14.321		2.93295e-06	-5.56531	-5.51318	-5.57687	-4.91436	-4.88279
	65	-16.0638	-16.0689	-16.1261	-14.8981		2.93295e-06	-5.47701	-5.47875	-5.49825	-5.07956			65	-16.1919	-16.0229	-16.1505	-14.5073	-14.2967		2.93295e-06	-5.52068	-5.46306	-5.50657	-4.94631	-4.87451
	66	-15.7065	-15.798	-15.7389	-14.6373		2.93295e-06	-5.35518	-5.38638	-5.36623	-4.99064			66	-15.9754	-15.9103	-15.9727	-14.4675	-14.3447		2.93295e-06	-5.44687	-5.42467	-5.44595	-4.93274	-4.89087
	67	-15.6151	-15.327	-15.4129	-14.5938		2.93295e-06	-5.32402	-5.22579	-5.25508	-4.9758			67	-15.7539	-15.7127	-15.7784	-14.5644	-14.3561		2.93295e-06	-5.37134	-5.3573	-5.3797	-4.96578	-4.89476
	68	-15.5487	-15.1814	-15.1354	-14.6166		2.93295e-06	-5.30138	-5.17615	-5.16047	-4.98358			68	-15.5836	-15.5387	-15.5284	-14.6537	-14.4792		2.93295e-06	-5.31328	-5.29797	-5.29446	-4.99623	-4.93673
	69	-15.4631	-15.1651	-15.1011	-14.4388		2.93295e-06	-5.2722	-5.17059	-5.14877	-4.92296			69	-15.3913	-15.3366	-15.3401	-14.539	-14.4963		2.93295e-06	-5.24772	-5.22906	-5.23026	-4.95712	-4.94256
	70	-15.3859	-15.0645	-14.9505	-14.4843		2.93295e-06	-5.24587	-5.13629	-5.09742	-4.93847			70	-15.199	-15.0839	-15.176	-14.4413	-14.5601		2.93295e-06	-5.18215	-5.14291	-5.17431	-4.92381	-4.96431
	71	-15.2224	-14.9779	-14.7265	-14.3773		2.93295e-06	-5.19013	-5.10676	-5.02105	-4.90199			71	-15.1336	-15.0264	-14.9602	-14.5334	-14.6927		2.93295e-06	-5.15985	-5.1233	-5.10073	-4.95521	-5.00953
	72	-15.0108	-14.7433	-14.7879	-14.2774		2.93295e-06	-5.11798	-5.02678	-5.04198	-4.86793			72	-15.1075	-14.9242	-14.9083	-14.4907	-14.6169		2.93295e-06	-5.15095	-5.08846	-5.08303	-4.94065	-4.98368
	73	-14.7205	-14.6701	-14.7938	-14.2761		2.93295e-06	-5.019	-5.00182	-5.044	-4.86748			73	-14.996	-14.8615	-14.7834	-14.5103	-14.5628		2.93295e-06	-5.11294	-5.06708	-5.04045	-4.94734	-4.96524
	74	-14.6625	-14.7167	-14.5948	-14.3994		2.93295e-06	-4.99923	-5.01771	-4.97615	-4.90952			74	-14.8135	-14.736	-14.6549	-14.5424	-14.5532		2.93295e-06	-5.05071	-5.02429	-4.99664	-4.95828	-4.96196
	75	-14.7494	-14.6673	-14.7071	-14.5537		2.93295e-06	-5.02886	-5.00086	-5.01443	-4.96213			75	-14.5931	-14.613	-14.6344	-14.4911	-14.5127		2.93295e-06	-4.97557	-4.98235	-4.98965	-4.94079	-4.94815
	76	-14.5257	-14.7591	-14.7062	-14.5043		2.93295e-06	-4.95259	-5.03216	-5.01413	-4.94529			76	-14.3945	-14.5336	-14.6058	-14.5123	-14.5216		2.93295e-06	-4.90785	-4.95528	-4.9799	-4.94802	-4.95119
	77	-14.3873	-14.557	-14.6564	-14.5912		2.93295e-06	-4.9054	-4.96326	-4.99715	-4.97492			77	-14.3139	-14.4948	-14.4341	-14.4807	-14.4758		2.93295e-06	-4.88037	-4.94205	-4.92135	-4.93724	-4.93557
	78	-14.2234	-14.4159	-14.4697	-14.6274		2.93295e-06	-4.84952	-4.91515	-4.93349	-4.98726			78	-14.2745	-14.4659	-14.3763	-14.5593	-14.4339		2.93295e-06	-4.86694	-4.9322	-4.90165	-4.96404	-4.92129
	79	-14.0687	-14.3111	-14.4121	-14.5813		2.93295e-06	-4.79677	-4.87942	-4.91385	-4.97154			79	-14.2184	-14.4995	-14.3609	-14.5225	-14.491		2.93295e-06	-4.84781	-4.94365	-4.8964	-4.95149	-4.94075
	80	-13.9475	-14.3291	-14.3023	-14.6098		2.93295e-06	-4.75545	-4.88555	-4.87642	-4.98126			80	-14.1852	-14.3933	-14.294	-14.4785	-14.4267		2.93295e-06	-4.83649	-4.90744	-4.87359	-4.93649	-4.91883
	81	-13.8452	-14.3469	-14.1325	-14.6711		2.93295e-06	-4.72057	-4.89162	-4.81852	-5.00216			81	-14.1633	-14.2279	-14.2199	-14.4929	-14.4291		2.93295e-06	-4.82902	-4.85105	-4.84832	-4.9414	-4.91965
	82	-13.9808	-14.3529	-14.0543	-14.7291		2.93295e-06	-4.7668	-4.89367	-4.79186	-5.02194			82	-14.1079	-14.2459	-14.1309	-14.5238	-14.344		2.93295e-06	-4.81014	-4.85719	-4.81798	-4.95194	-4.89063
	83	-13.9681	-14.1261	-14.0252	-14.525		2.93295e-06	-4.76247	-4.81634	-4.78194	-4.95235			83	-13.9699	-14.2197	-14.1669	-14.4825	-14.283		2.93295e-06	-4.76308	-4.84825	-4.83025	-4.93786	-4.86984
	84	-13.8893	-14.0047	-13.9537	-14.4425		2.93295e-06	-4.7356	-4.77495	-4.75756	-4.92422			84	-13.8807	-14.2024	-14.1645	-14.4442	-14.2649		2.93295e-06	-4.73267	-4.84236	-4.82943	-4.9248	-4.86367
	85	-13.9057	-14.0385	-13.8629	-14.5068		2.93295e-06	-4.74119	-4.78647	-4.7266	-4.94614			85	-13.8473	-14.1823	-14.1748	-14.3966	-14.1955		2.93295e-06	-4.72128	-4.8355	-4.83295	-4.90857	-4.84
	86	-13.8163	-14.1173	-13.913	-14.2775		2.93295e-06	-4.71071	-4.81334	-4.74368	-4.86796			86	-13.7361	-14.0785	-14.2244	-14.2327	-14.166		2.93295e-06	-4.68337	-4.80011	-4.84986	-4.85269	-4.82994
	87	-13.8235	-14.0589	-14.0047	-14.1992		2.93295e-06	-4.71317	-4.79343	-4.77495	-4.84126			87	-13.6168	-14.0512	-14.1986	-14.1435	-14.1386		2.93295e-06	-4.64269	-4.7908	-4.84106	-4.82227	-4.8206
	88	-13.8085	-14.0846	-14.0755	-14.0833		2.93295e-06	-4.70805	-4.80219	-4.79909	-4.80175			88	-13.5802	-14.006	-14.241	-14.0539	-14.1046		2.93295e-06	-4.63021	-4.77539	-4.85552	-4.79172	-4.80901
	89	-13.6995	-14.0228	-14.2452	-13.9859		2.93295e-06	-4.67089	-4.78112	-4.85695	-4.76854			89	-13.5265	-14.0533	-14.2711	-13.9163	-13.9875		2.93295e-06	-4.61191	-4.79152	-4.86578	-4.74481	-4.76908
	90	-13.6532	-13.9761	-14.411	-13.8607		2.93295e-06	-4.6551	-4.7652	-4.91348	-4.72585			90	-13.5308	-14.0183	-14.3261	-13.8694	-13.9238		2.93295e-06	-4.61337	-4.77959	-4.88453	-4.72882	-4.74737

## Sheet: Thermodynamic parameters
0.5度(20-90)							1度(20-90)						2度(20-90)
R	Rsqr	Adj Rsqr	Standard Error of Estimate				R	Rsqr	Adj Rsqr	Standard Error of Estimate			R	Rsqr	Adj Rsqr	Standard Error of Estimate
0.999	0.9979	0.9978		0.0297			0.9981	0.9962	0.996		0.0365		0.9977	0.9955	0.9952		0.0399
	Coefficient	Std. Error	t	P	VIF			Coefficient	Std. Error	t	P	VIF		Coefficient	Std. Error	t	P	VIF
Yn	-6.3594	0.0141	-452.608	<0.0001	8.6151<		Yn	-6.2759	0.0342	-183.594	<0.0001	33.0936<	Yn	-6.3078	0.0802	-78.6286	<0.0001	147.5276<
Yu	-4.5784	0.0308	-148.69	<0.0001	19.1737<		Yu	-4.7987	0.0187	-256.738	<0.0001	5.5236<	Yu	-4.8051	0.0204	-235.119	<0.0001	5.5901<
H	30209.1	903.039	33.4528	<0.0001	5.2545<		H	38698.1	1427.98	27.0998	<0.0001	3.5159	H	36065.7	2698.99	13.3626	<0.0001	15.8157<
C	260.514	174.547	1.4925	0.1403	13.1594<		C	757.35	450.198	1.6823	0.0972	25.1063<	C	799.18	551.956	1.4479	0.1524	72.1936<
Tm	338.804	0.3353	1010.53	<0.0001	8.8745<		Tm	337.239	0.341	988.884	<0.0001	5.3897<	Tm	336.851	0.7244	465.01	<0.0001	19.6365<
	熱力學參數	標準差						熱力學參數	標準差					熱力學參數	標準差
Tm(℃)	65.8036	0.3353					Tm(℃)	64.2386	0.341				Tm(℃)	63.8514	0.7244
DH (kcal mol-1)	30.2091	0.903039					DH (kcal mol-1)	38.6981	1.42798				DH (kcal mol-1)	36.0657	2.69899
DS (cal K-1 mol-1)	89.1642	0.0409954					DS (cal K-1 mol-1)	114.75	0.0797417				DS (cal K-1 mol-1)	107.067	0.306697
DG(25℃)(cal K-1 mol-1)	2970.75						DG(25℃)(cal K-1 mol-1)	2702.53					DG(25℃)(cal K-1 mol-1)	2296.03
DG(25℃)(kcal K-1 mol-1)	2.97075						DG(25℃)(kcal K-1 mol-1)	2.70253					DG(25℃)(kcal K-1 mol-1)	2.29603
R	Rsqr	Adj Rsqr	Standard Error of Estimate				R	Rsqr	Adj Rsqr	Standard Error of Estimate			R	Rsqr	Adj Rsqr	Standard Error of Estimate
0.999	0.9979	0.9978		0.0297			0.9981	0.9962	0.996		0.0365		0.999	0.9979	0.9978		0.0297
	Coefficient	Std. Error	t	P	VIF			Coefficient	Std. Error	t	P	VIF		Coefficient	Std. Error	t	P	VIF
Yn	-6.3597	0.0142	-448.479	<0.0001	8.7712<		Yn	-6.2728	0.0271	-231.618	<0.0001	20.8392<	Yn	-6.3599	0.0142	-446.412	<0.0001	8.8508<
Yu	-4.5789	0.0307	-149.294	<0.0001	19.0372<		Yu	-4.7977	0.0185	-258.834	<0.0001	5.4116<	Yu	-4.5793	0.0306	-149.691	<0.0001	18.9491<
H	30212.6	899.713	33.5803	<0.0001	5.2232<		H	38769.8	1348.83	28.7433	<0.0001	2.9849	H	30219.9	898.015	33.6518	<0.0001	5.2038<
C	264.234	174.73	1.5122	0.1352	13.2636<		C	714.106	407.557	1.7522	0.0844	17.6293<	C	266.289	174.867	1.5228	0.1326	13.3123<
Tm	338.797	0.3351	1010.91	<0.0001	8.8668<		Tm	337.259	0.2997	1125.21	<0.0001	4.1578<	Tm	338.793	0.3349	1011.62	<0.0001	8.8537<
	熱力學參數	標準差						熱力學參數	標準差					熱力學參數	標準差
Tm(℃)	65.7971	0.3351					Tm(℃)	64.2588	0.2997				Tm(℃)	65.7925	0.3349
DH (kcal mol-1)	30.2126	0.899713					DH (kcal mol-1)	38.7698	1.34883				DH (kcal mol-1)	30.2199	0.898015
DS (cal K-1 mol-1)	89.1762	0.0406977					DS (cal K-1 mol-1)	114.956	0.070821				DS (cal K-1 mol-1)	89.1987	0.0405388
DG(25℃)(cal K-1 mol-1)	2961.33						DG(25℃)(cal K-1 mol-1)	2814.03					DG(25℃)(cal K-1 mol-1)	2956.73
DG(25℃)(kcal K-1 mol-1)	2.96133						DG(25℃)(kcal K-1 mol-1)	2.81403					DG(25℃)(kcal K-1 mol-1)	2.95673
	Tm(℃)	DH (kcal mol-1)	DS (cal K-1 mol-1)	DG(25℃)(kcal K-1 mol-1)
0.5℃(20-90)	65.8±0.3	30.2±0.9	89.16±0.04	2.97
1℃(20-90)	64.2±0.3	38.6±1.4	114.74±0.07	2.7
2℃(20-90)	63.8±0.7	36.0±2.6	107.06±0.30	2.29

## Sheet: 106.12.21
2.0min							1.0min							0.5							2	Thermodynamic parameters	Standard deviation
R	Rsqr	Adj Rsqr	Standard Error of Estimate				R	Rsqr	Adj Rsqr	Standard Error of Estimate				R	Rsqr	Adj Rsqr	Standard Error of Estimate				Tm(℃)	64.6012	1.5966			Tm(℃)	DH (kcal mol-1)	DS (cal K-1 mol-1)	DG(25℃)(kcal K-1 mol-1)
																					DH (kcal mol-1)	45.2414	7.15573		0.5℃(20-90)	63.2±1.7	39.2±2.4	116.5±0.26	3.08
0.999	0.998	0.9977		0.0213			0.9988	0.9977	0.9975		0.0254			0.999	0.998	0.9977		0.0192			DS (cal K-1 mol-1)	134.008	1.71718		1℃(20-90)	64.2±0.2	45.4±1.6	134.7±0.09	4.15
																					DG(25℃)(cal K-1 mol-1)	1857.22			2℃(20-90)	64.6±1.6	45.2±7.2	134.0±1.72	1.86
	Coefficient	Std. Error	t	P	VIF			Coefficient	Std. Error	t	P	VIF			Coefficient	Std. Error	t	P	VIF		DG(25℃)(kcal K-1 mol-1)	1.85722
																					1	Thermodynamic parameters	Standard deviation
Yn	-6.2089	0.1814	-34.2325	<0.0001	1168.4890<		Yn	-6.2123	0.0108	-576.752	<0.0001	5.3087<		Yn	-6.3267	0.1073	-58.9375	<0.0001	377.9954<		Tm(℃)	64.2256	0.2287
Yu	-4.8554	0.0481	-100.966	<0.0001	50.7093<		Yu	-4.8496	0.0242	-200.051	<0.0001	12.4301<		Yu	-4.8864	0.116	-42.1134	<0.0001	260.1675<		DH (kcal mol-1)	45.4211	1.64232
H	45241.4	7155.73	6.3224	<0.0001	140.4476<		H	45421.1	1642.32	27.6567	<0.0001	4.0687<		H	39157.4	2378.76	16.4612	<0.0001	20.6312<		DS (cal K-1 mol-1)	134.69	0.0888991
C	1425.96	1840.8	0.7746	0.4444	362.5240<		C	475.306	445.737	1.0663	0.2916	8.7845<		C	606.177	1350.41	0.4489	0.6575	173.0442<		DG(25℃)(cal K-1 mol-1)	4154.31
Tm	337.601	1.5966	211.455	<0.0001	334.1808<		Tm	337.226	0.2287	1474.32	<0.0001	5.0257<		Tm	336.191	1.6687	201.466	<0.0001	429.2329<		DG(25℃)(kcal K-1 mol-1)	4.15431
	熱力學參數	標準差						熱力學參數	標準差						熱力學參數	標準差					0.5	Thermodynamic parameters	Standard deviation
Tm(℃)	64.6012	1.5966					Tm(℃)	64.2256	0.2287					Tm(℃)	63.1912	1.6687					Tm(℃)	63.1912	1.6687
DH (kcal mol-1)	45.2414	7.15573					DH (kcal mol-1)	45.4211	1.64232					DH (kcal mol-1)	39.1574	2.37876					DH (kcal mol-1)	39.1574	2.37876
DS (cal K-1 mol-1)	134.008	1.71718					DS (cal K-1 mol-1)	134.69	0.0888991					DS (cal K-1 mol-1)	116.474	0.255529					DS (cal K-1 mol-1)	116.474	0.255529
DG(25℃)(cal K-1 mol-1)	1857.22						DG(25℃)(cal K-1 mol-1)	4154.31						DG(25℃)(cal K-1 mol-1)	3080.48						DG(25℃)(cal K-1 mol-1)	3080.48
DG(25℃)(kcal K-1 mol-1)	1.85722						DG(25℃)(kcal K-1 mol-1)	4.15431						DG(25℃)(kcal K-1 mol-1)	3.08048						DG(25℃)(kcal K-1 mol-1)	3.08048
